# Supplementary material
Source: PubMed Central journal article supplement (PMC5679310)

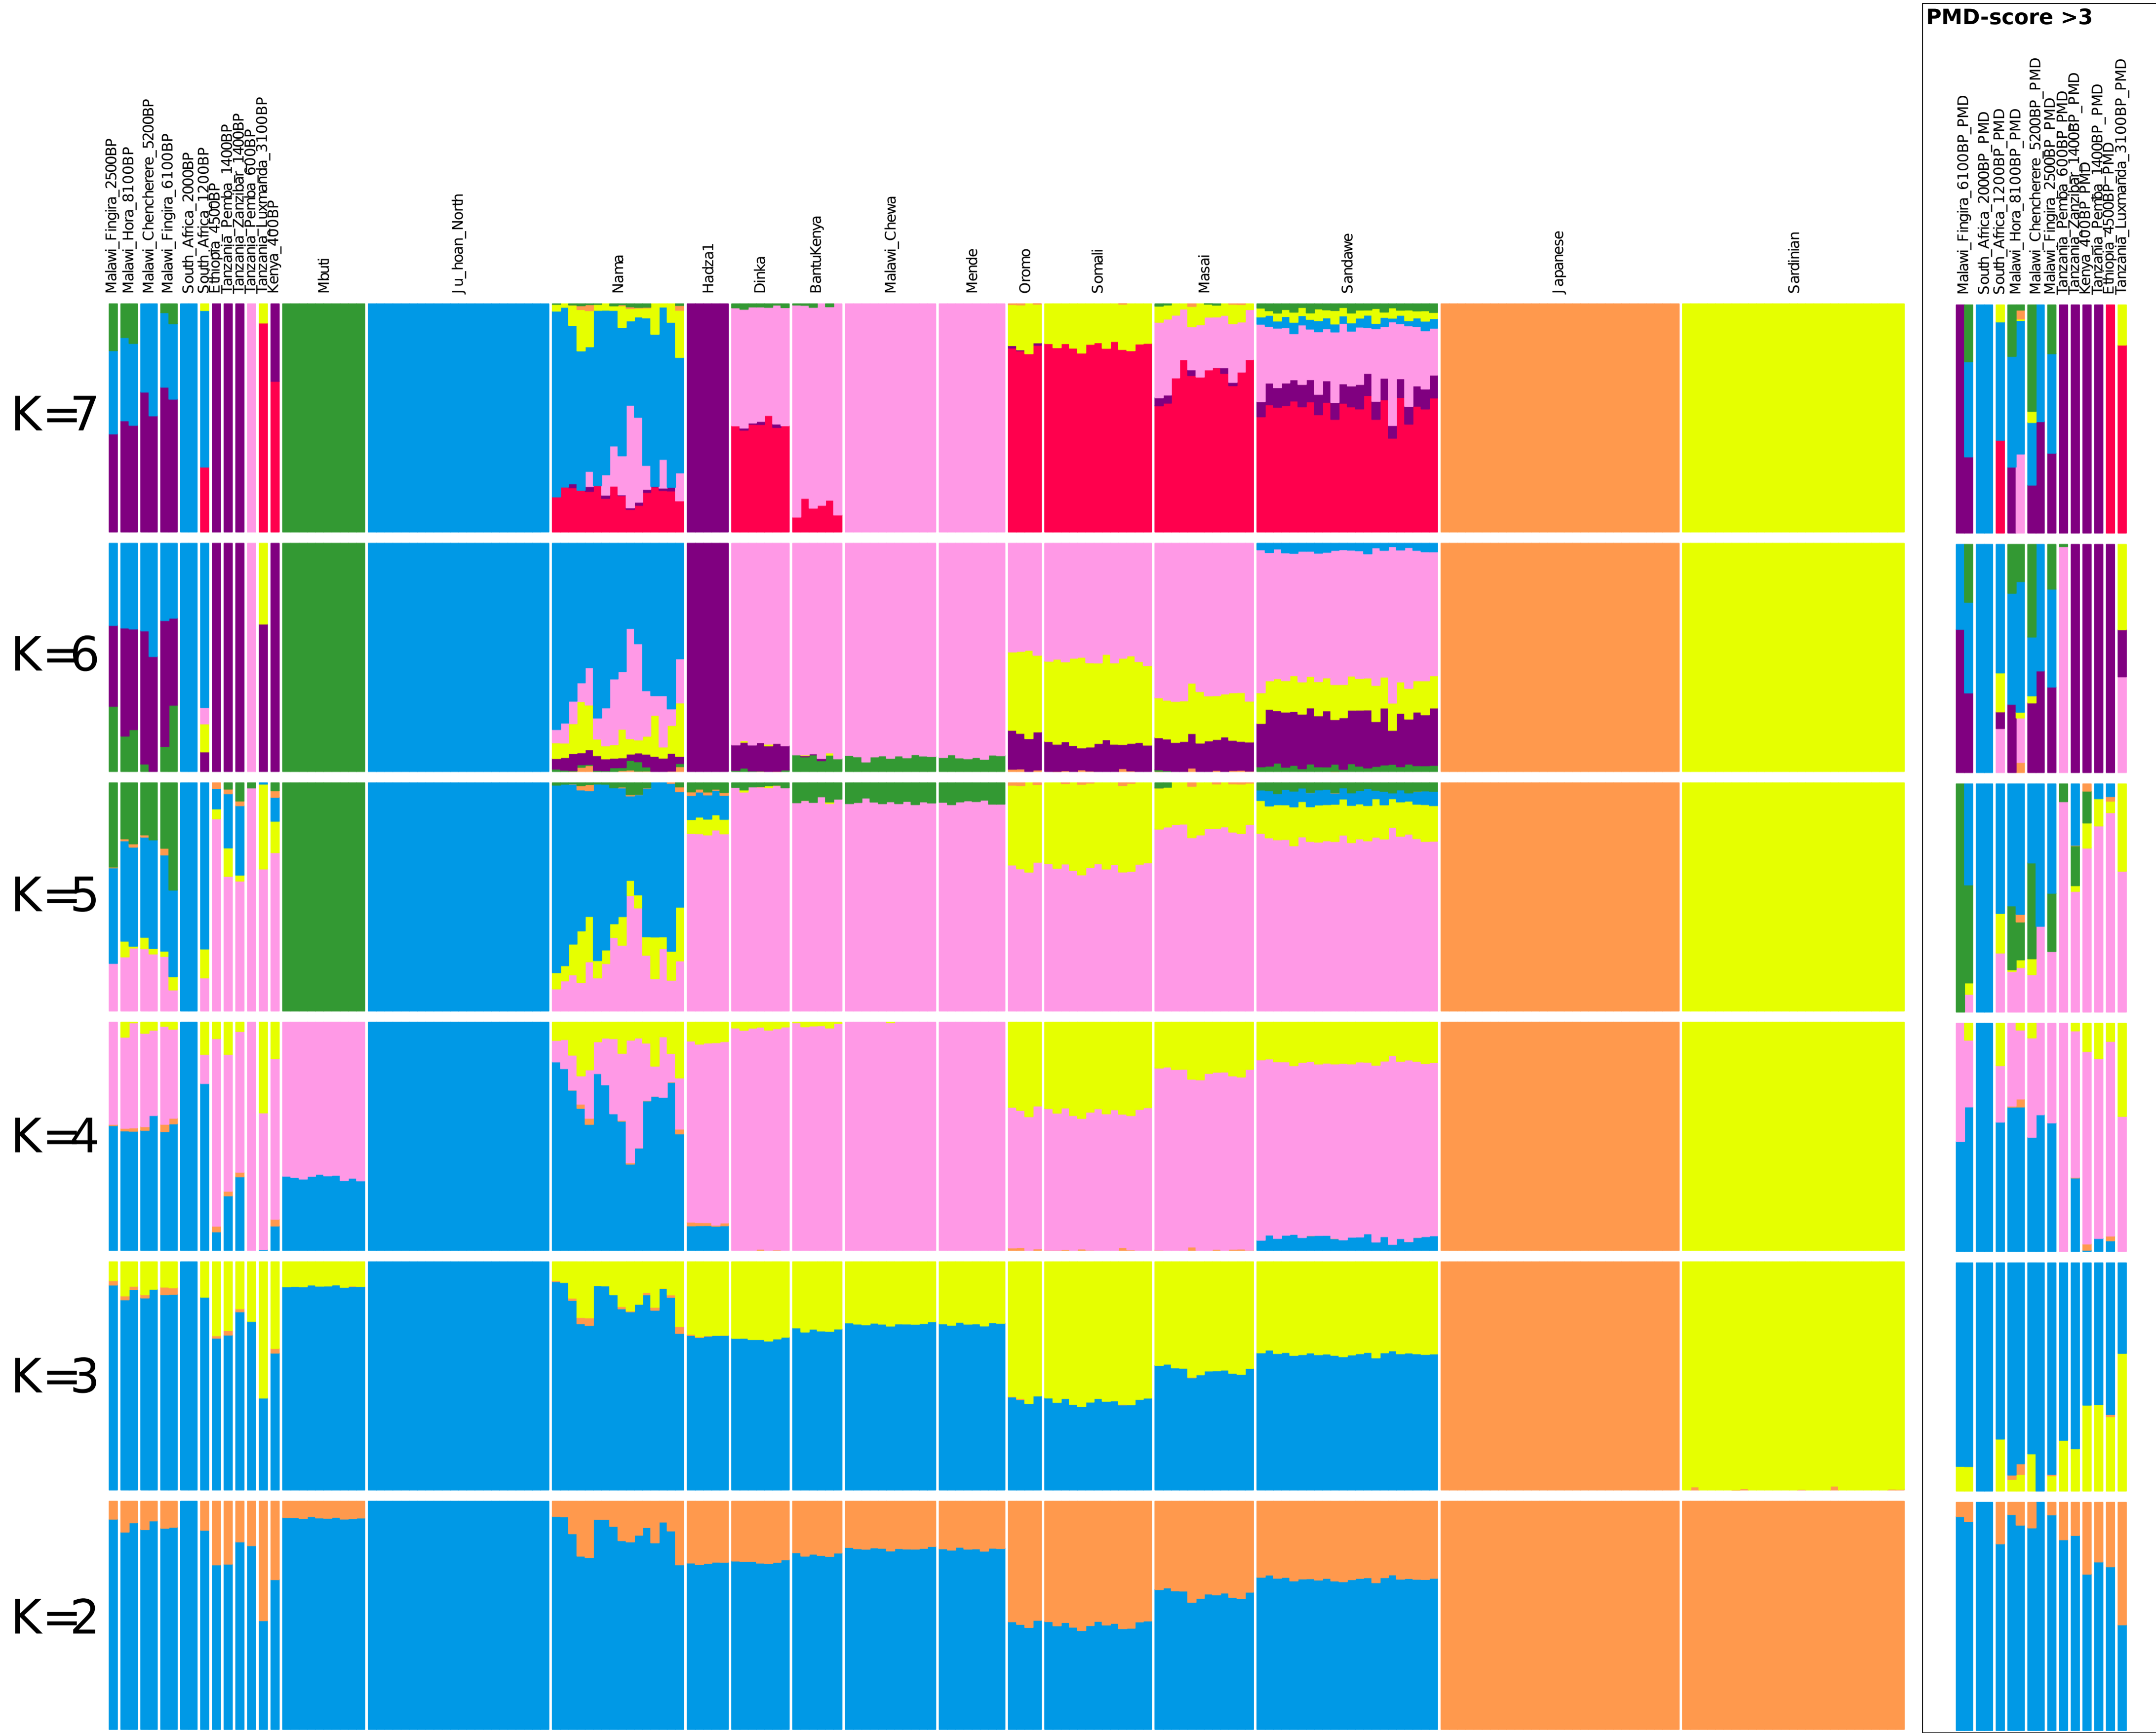

Supplement: NIHMS903612-supplement-10.pdf [file NIHMS903612-supplement-10.pdf]

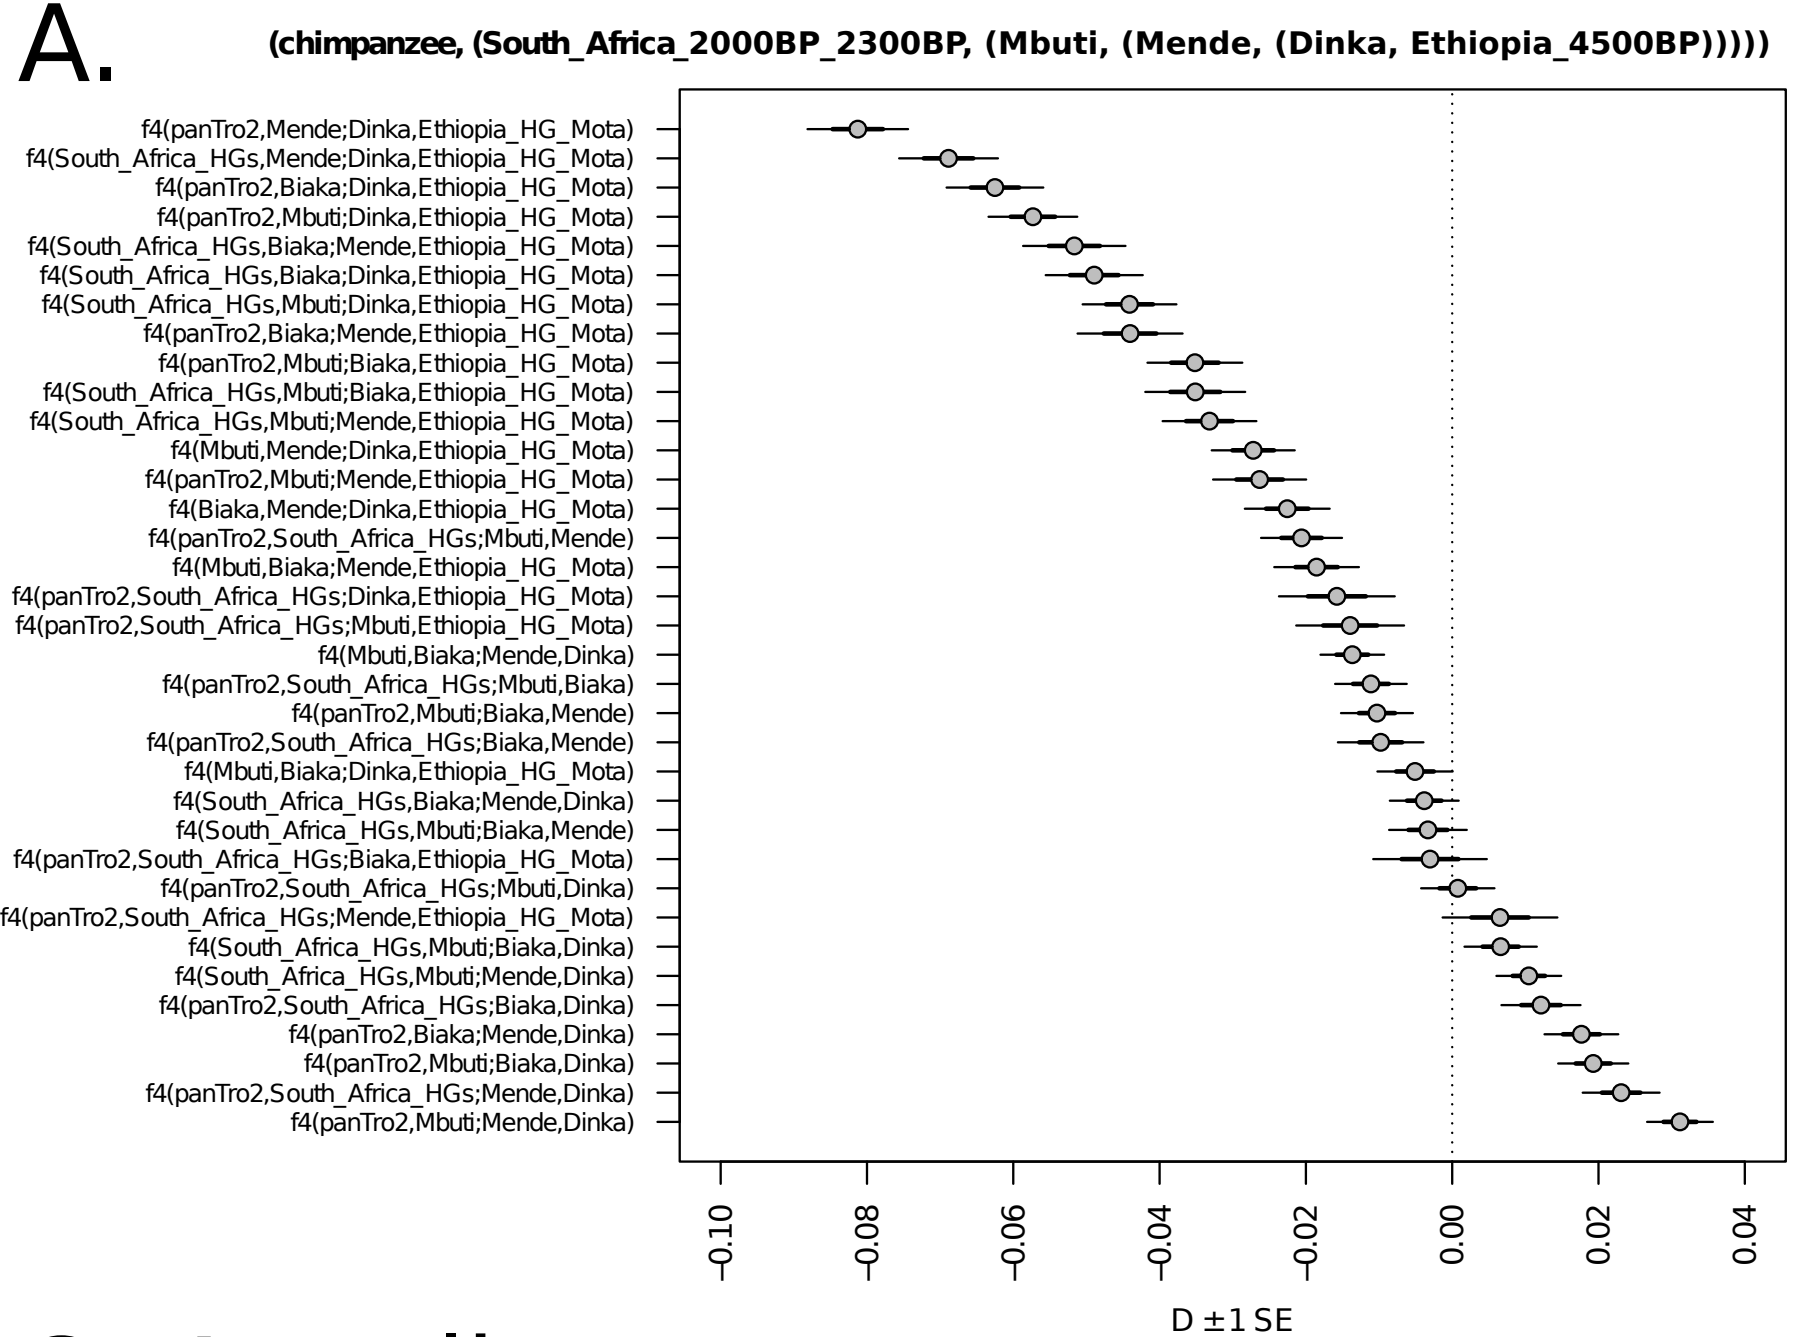

**B. 19 outliers**

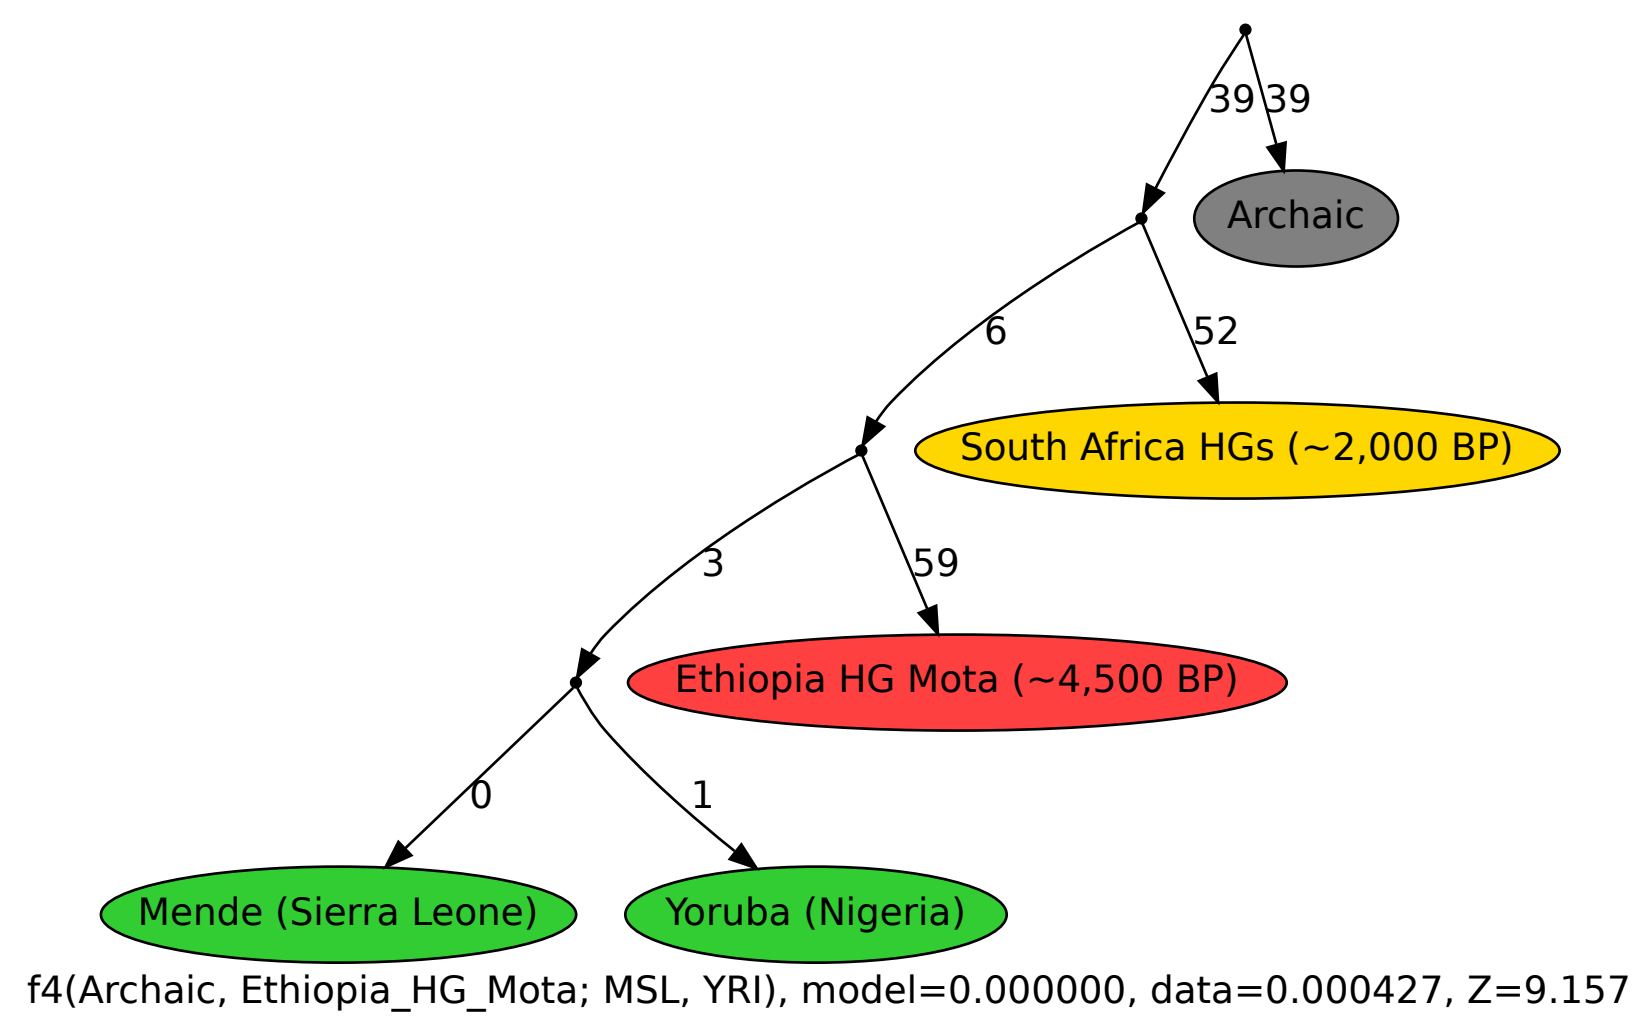

**C. 4 outliers**

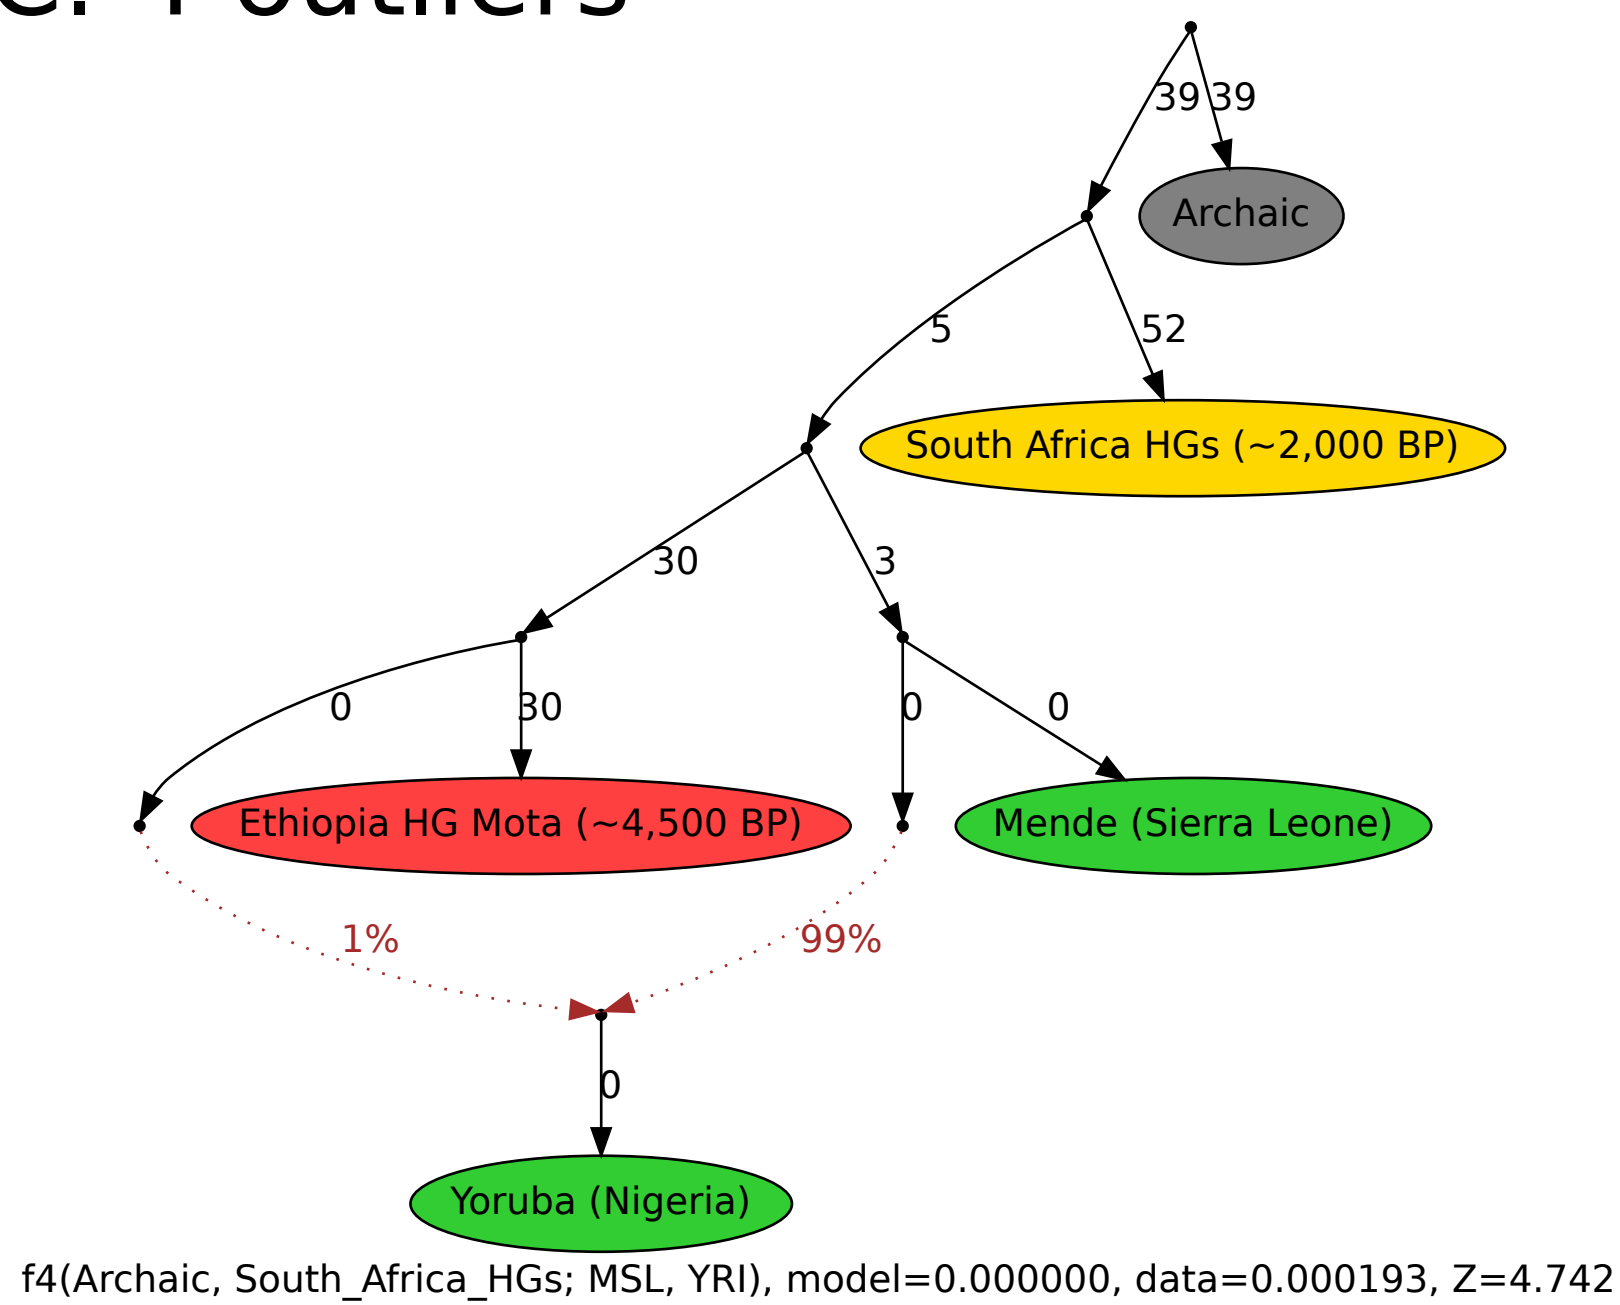

**D. 13 outliers**

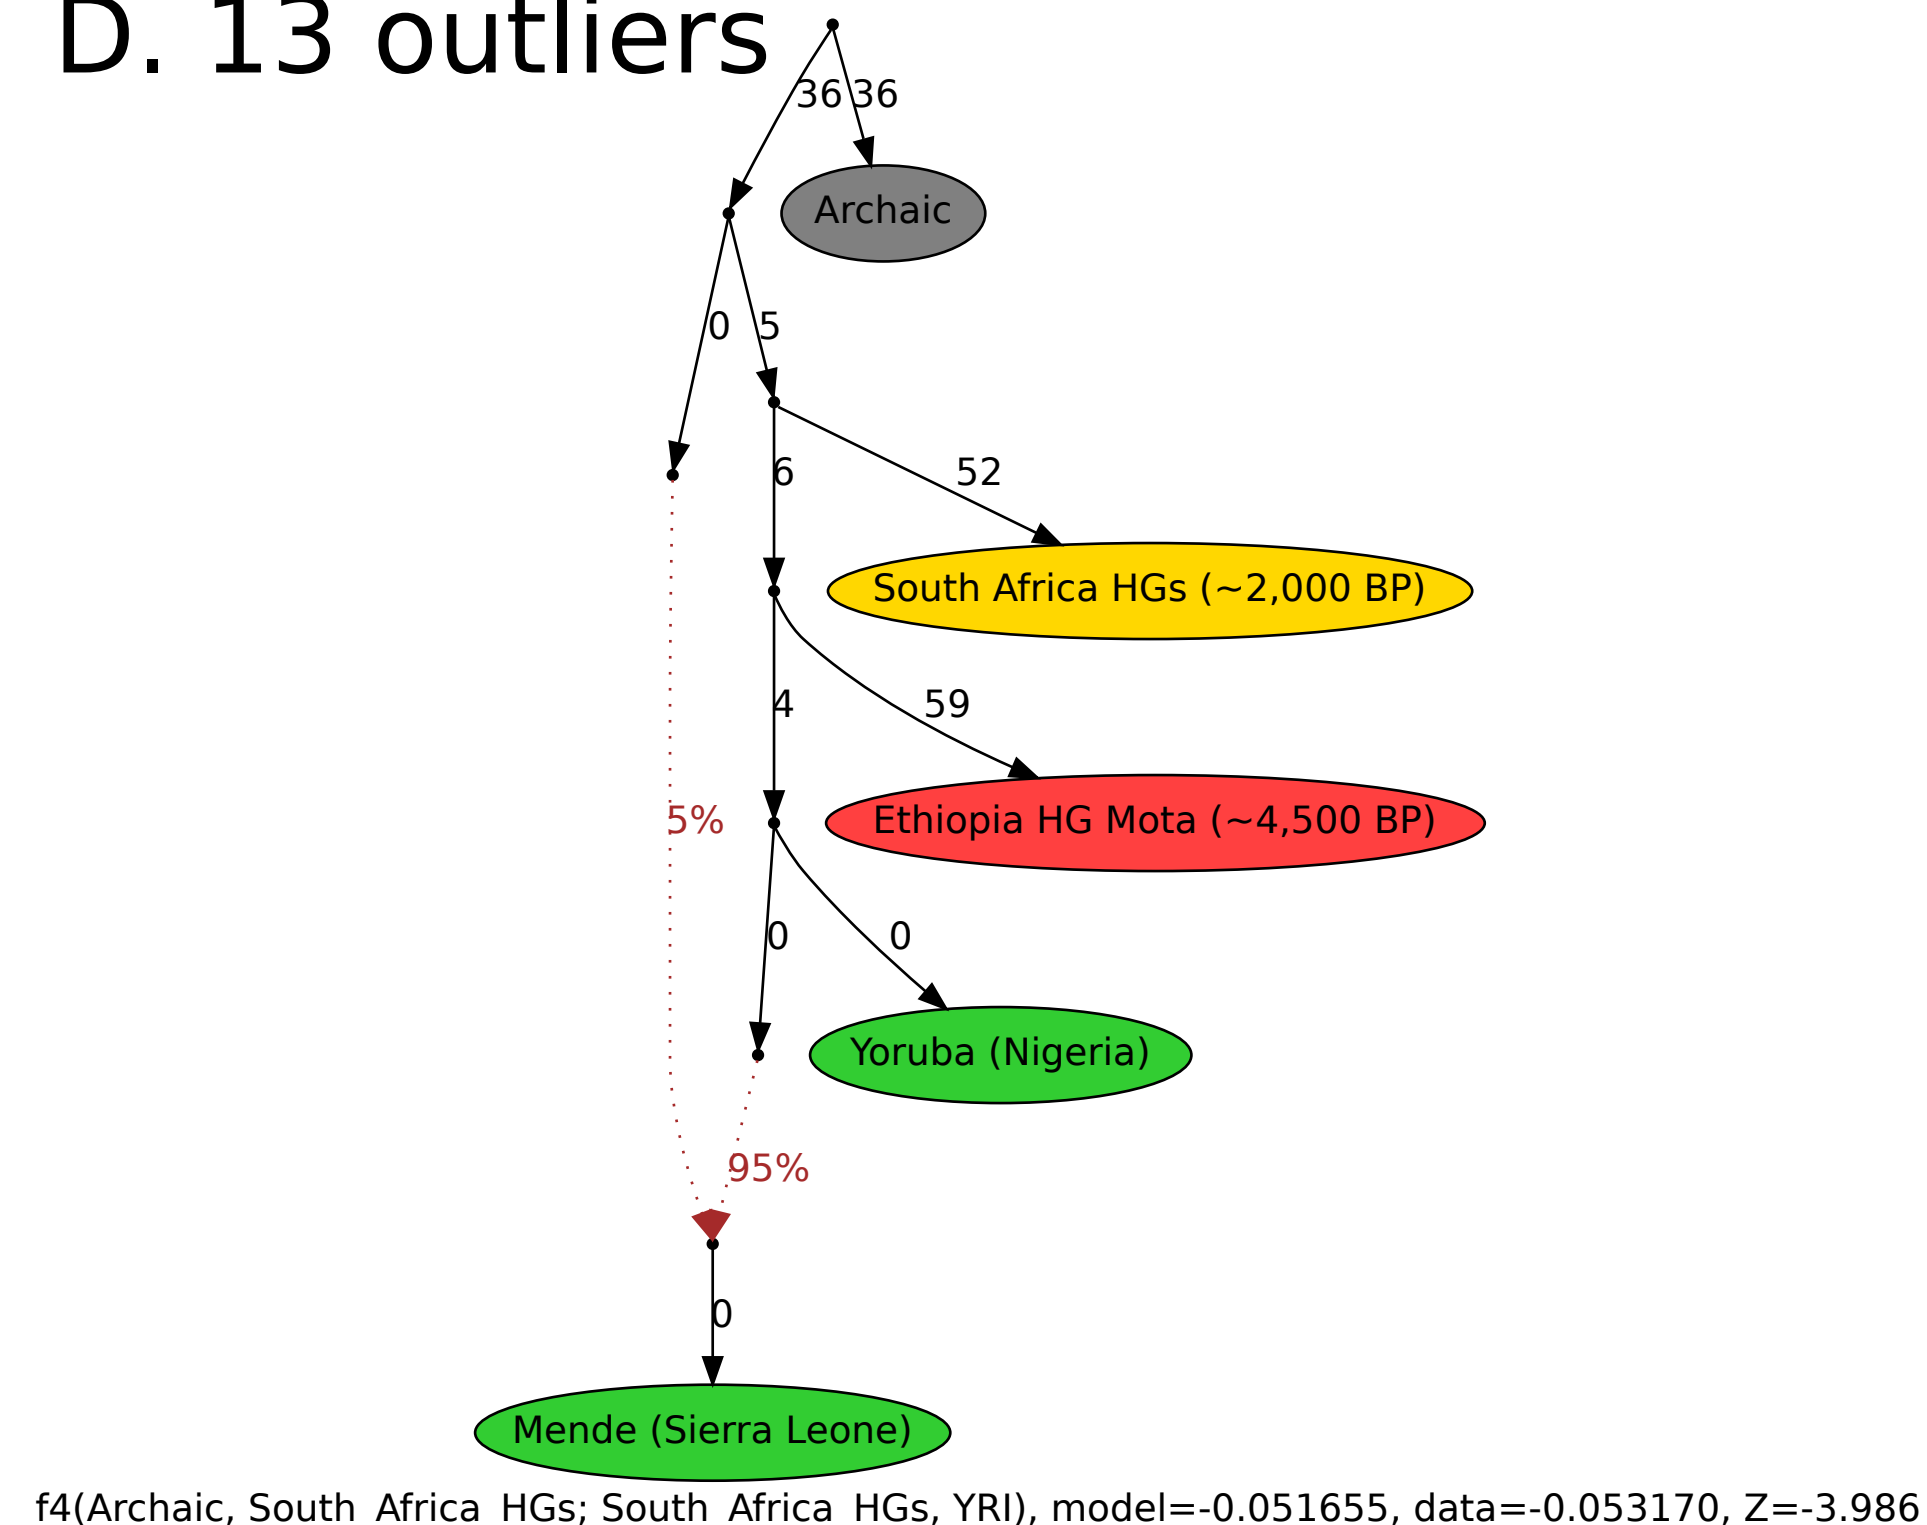

**E. 8 outliers**

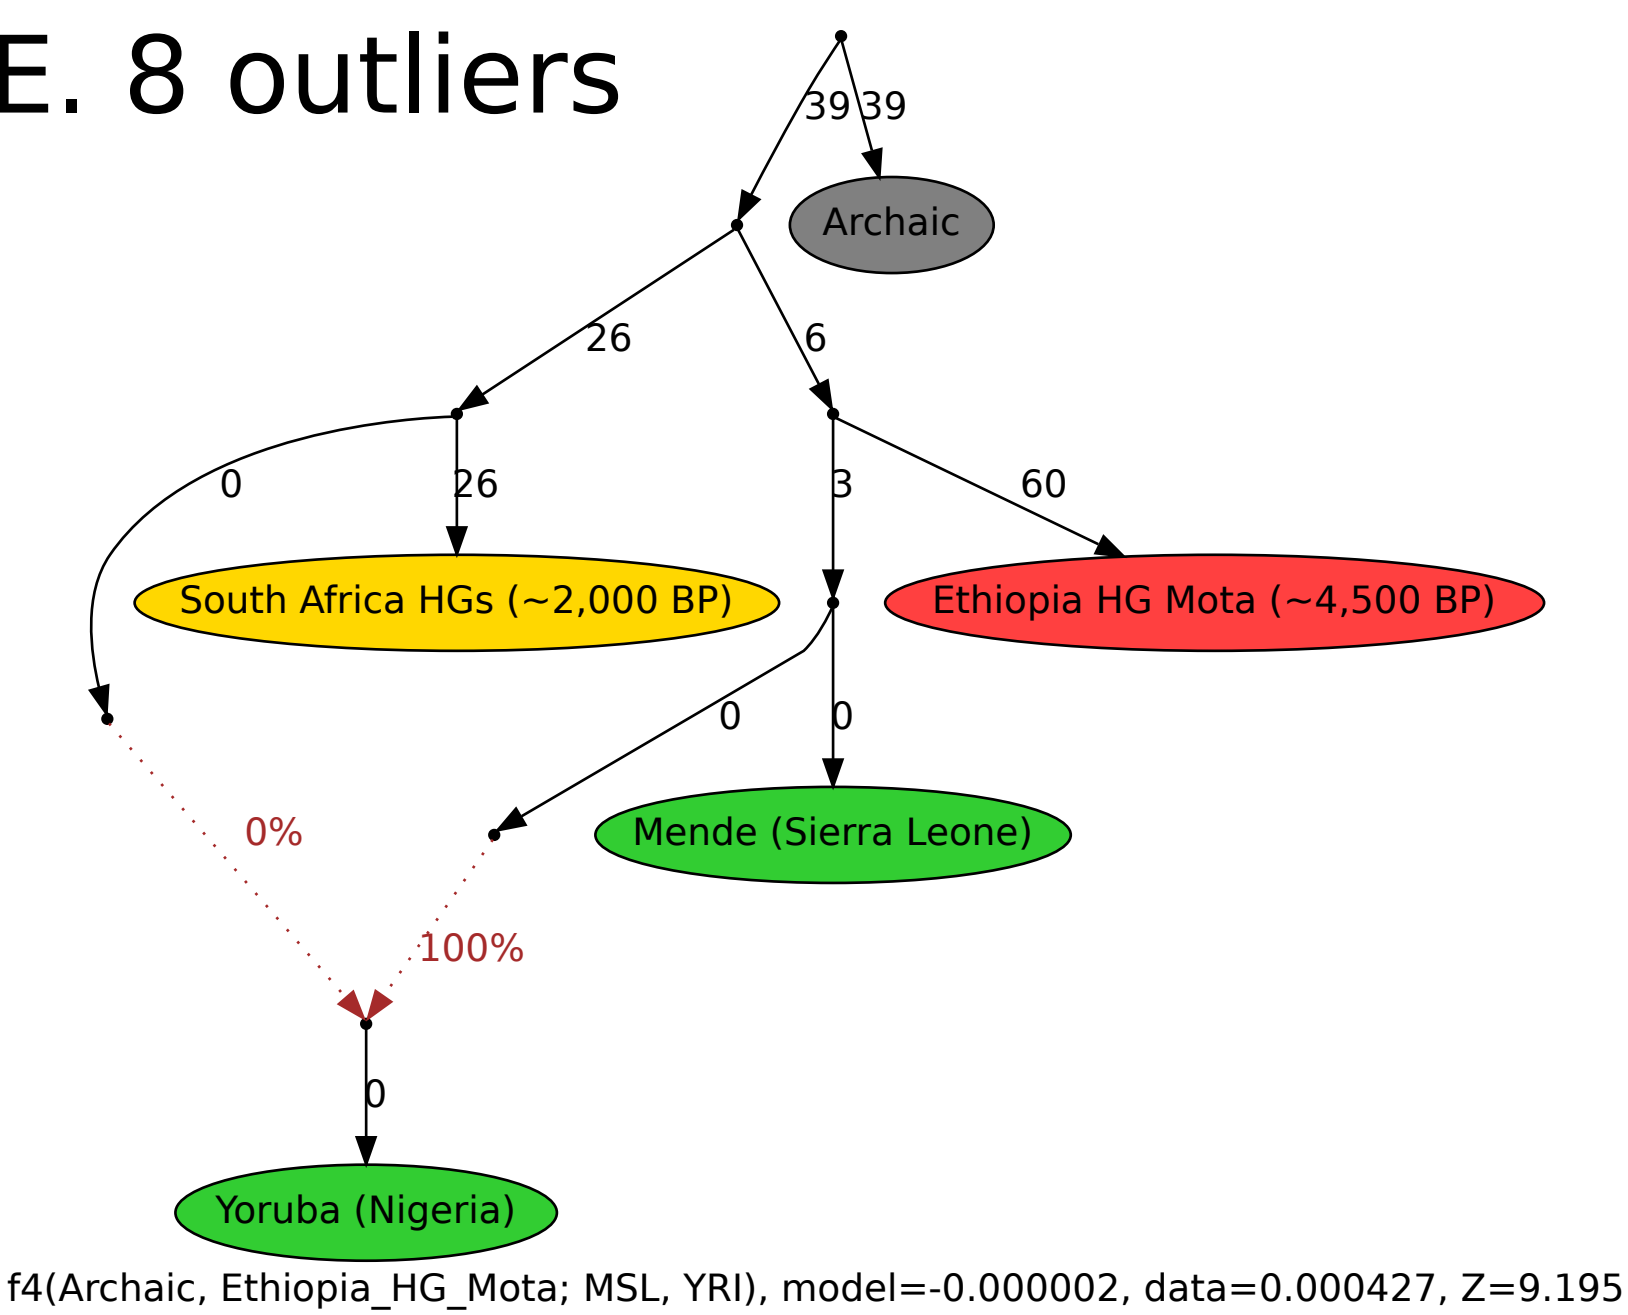

**F. 1 outlier**

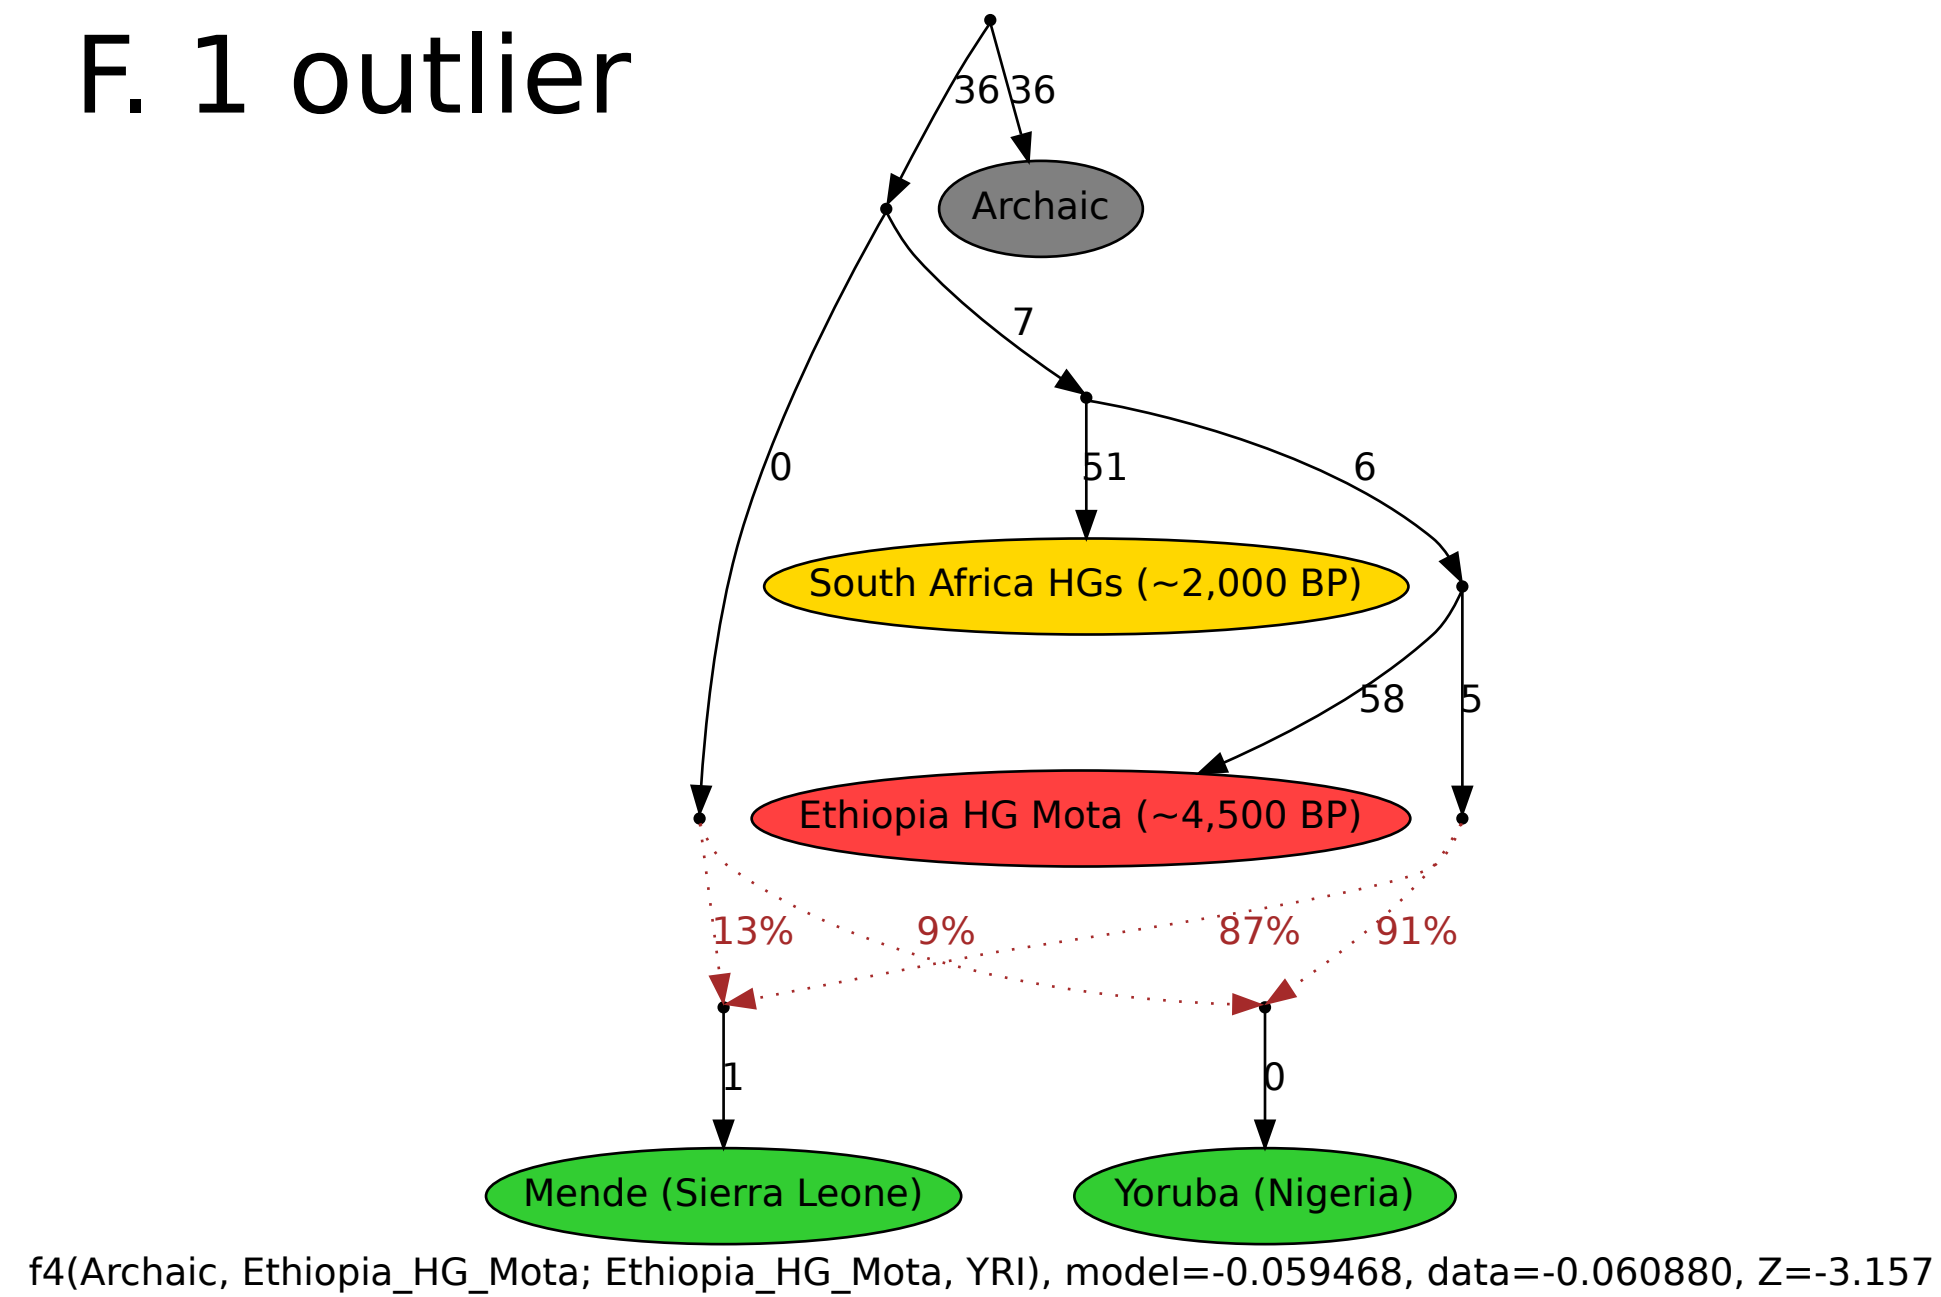

**G. 2 outliers**

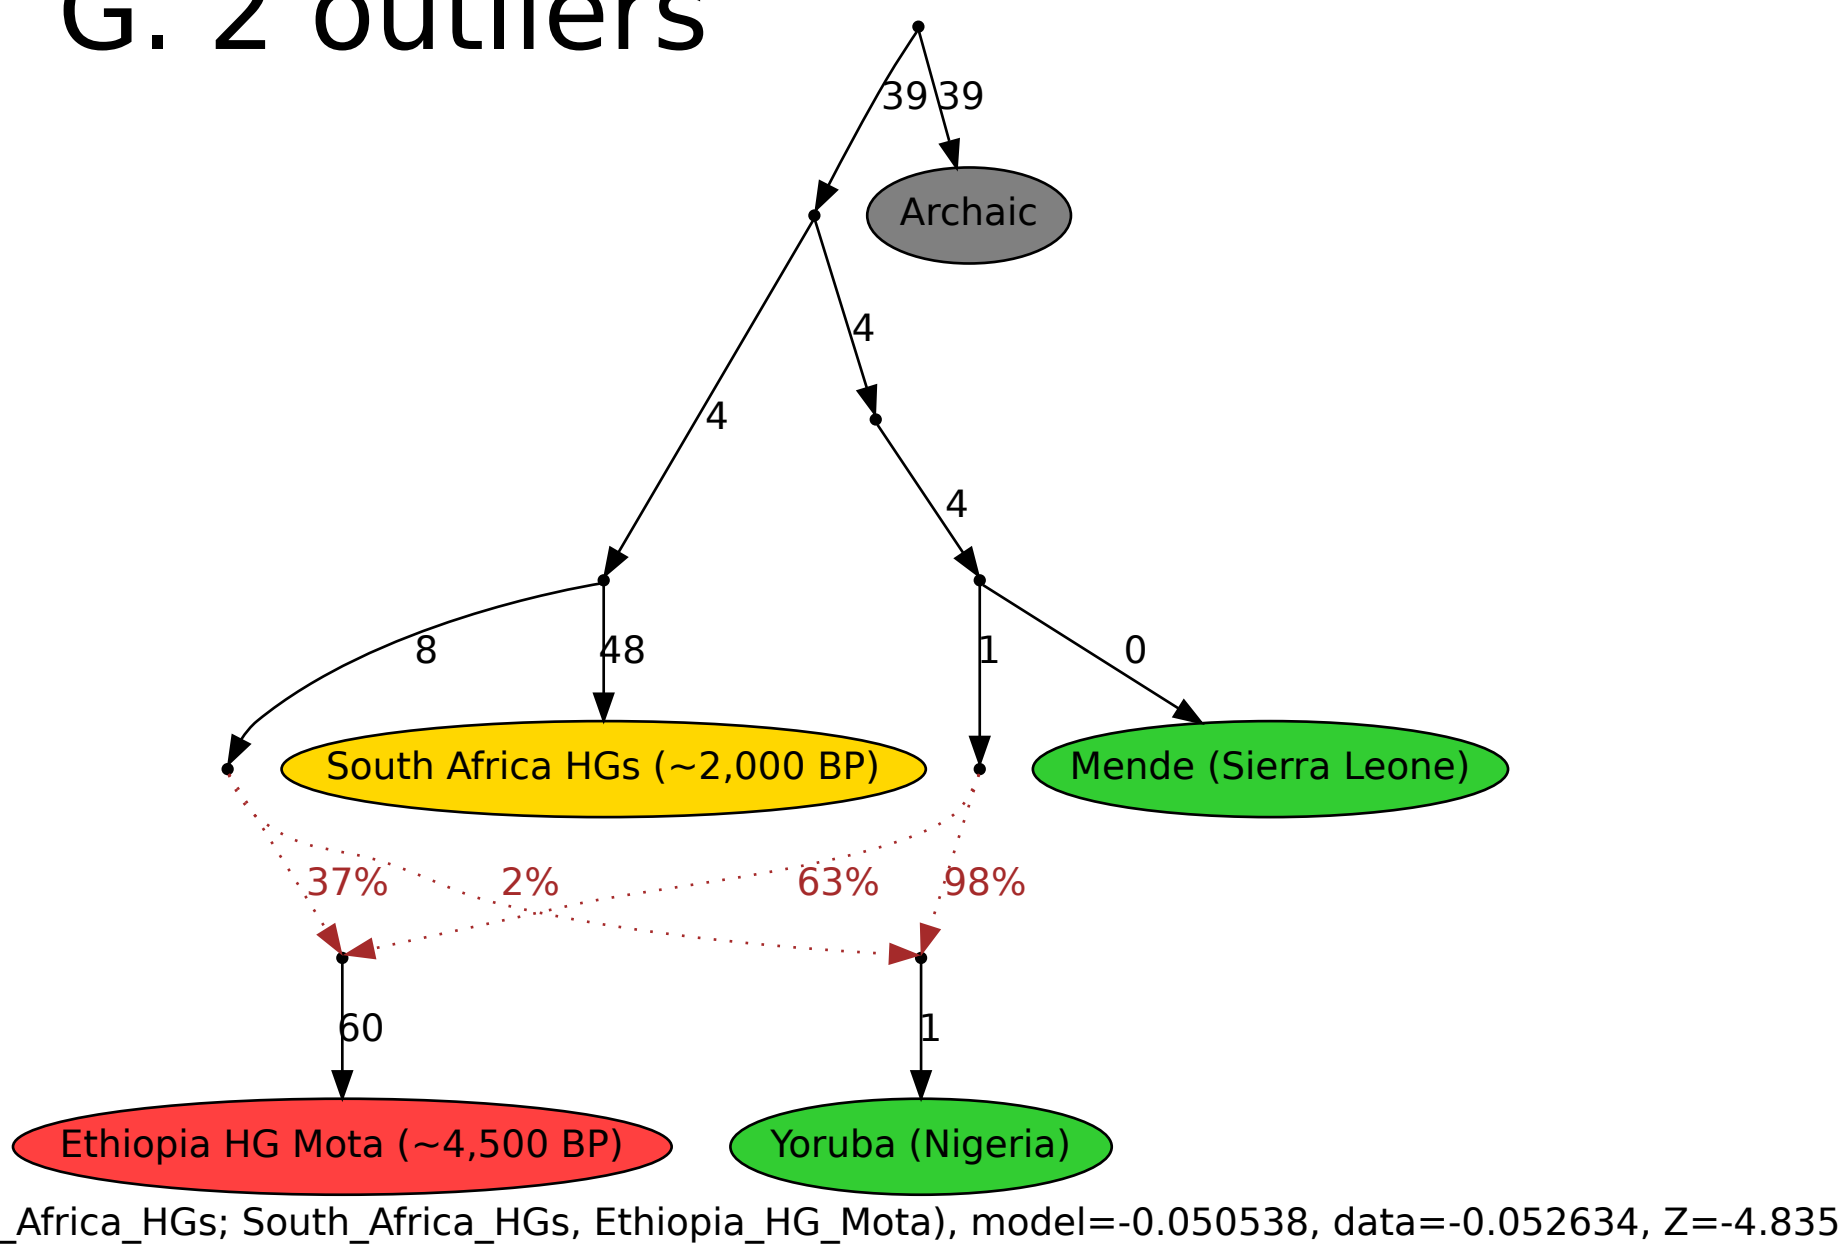

**H. 2 outliers**

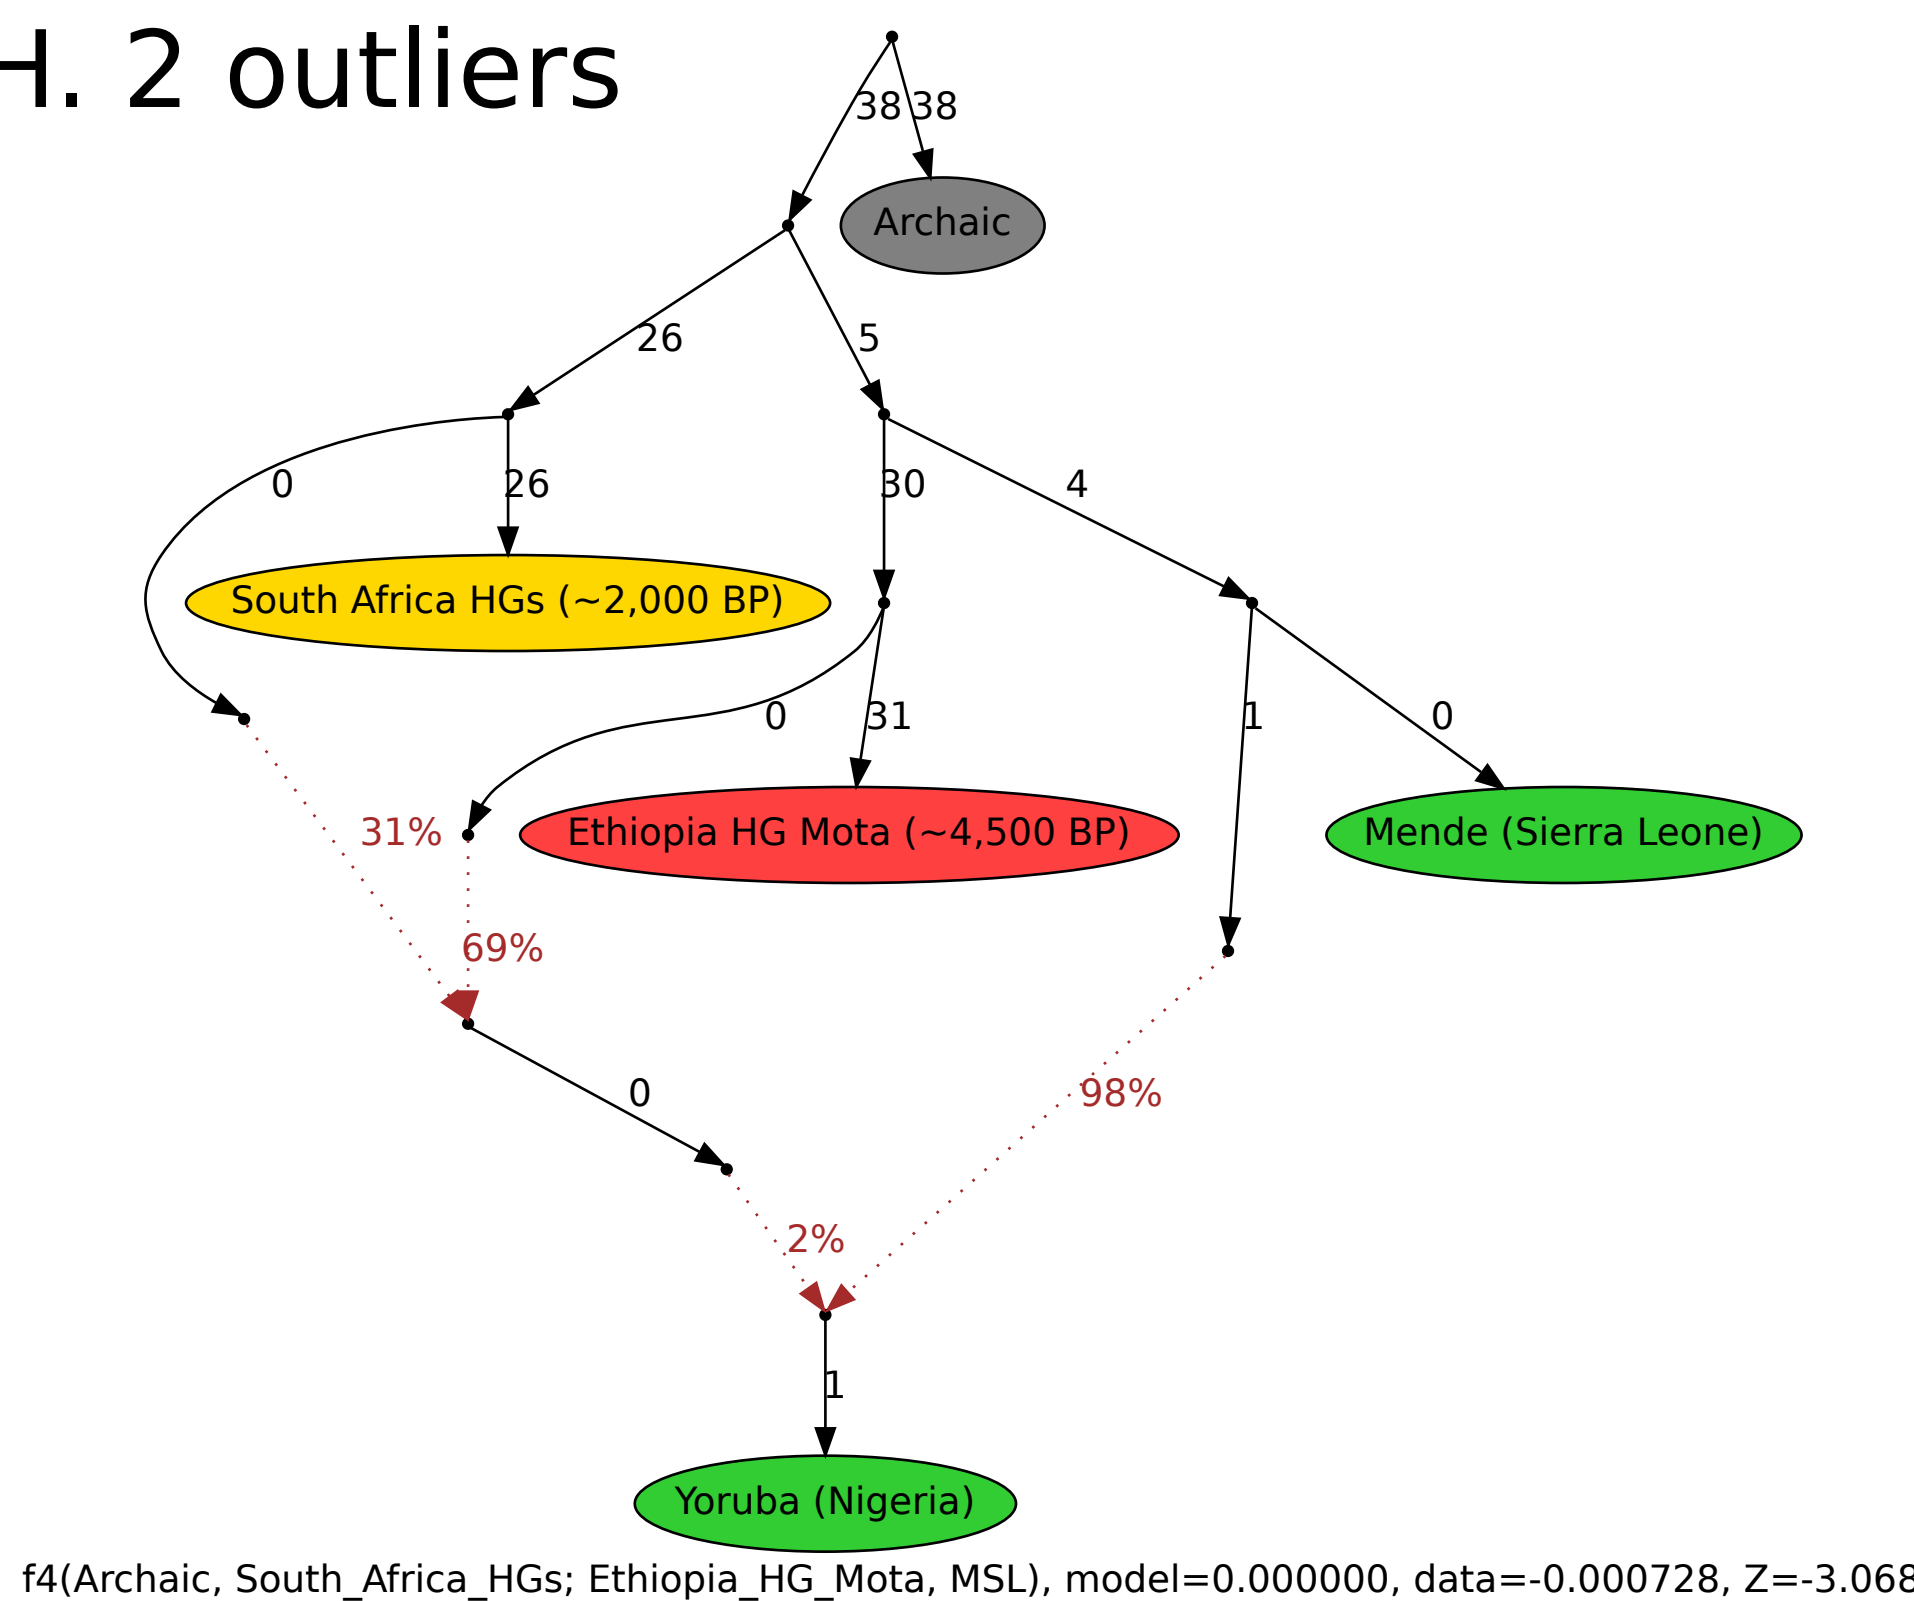

Supplement: NIHMS903612-supplement-11.pdf [file NIHMS903612-supplement-11.pdf]

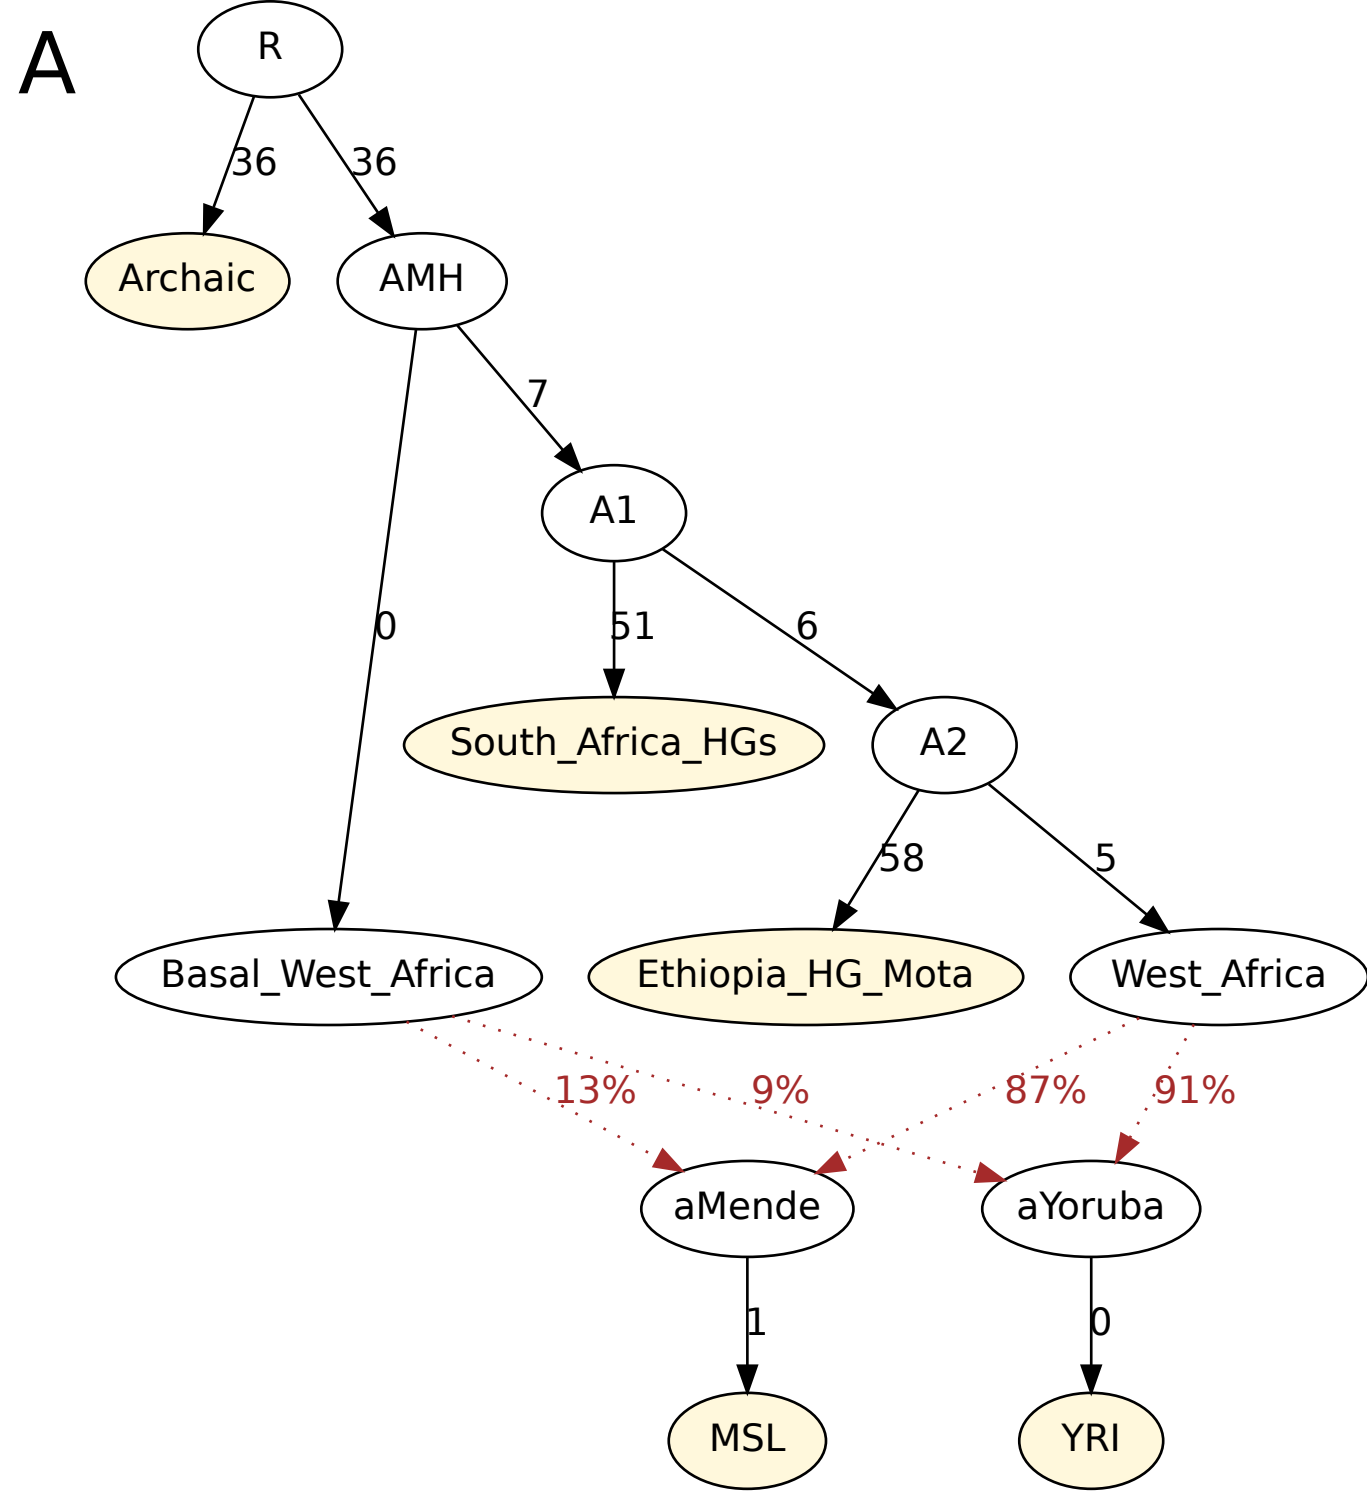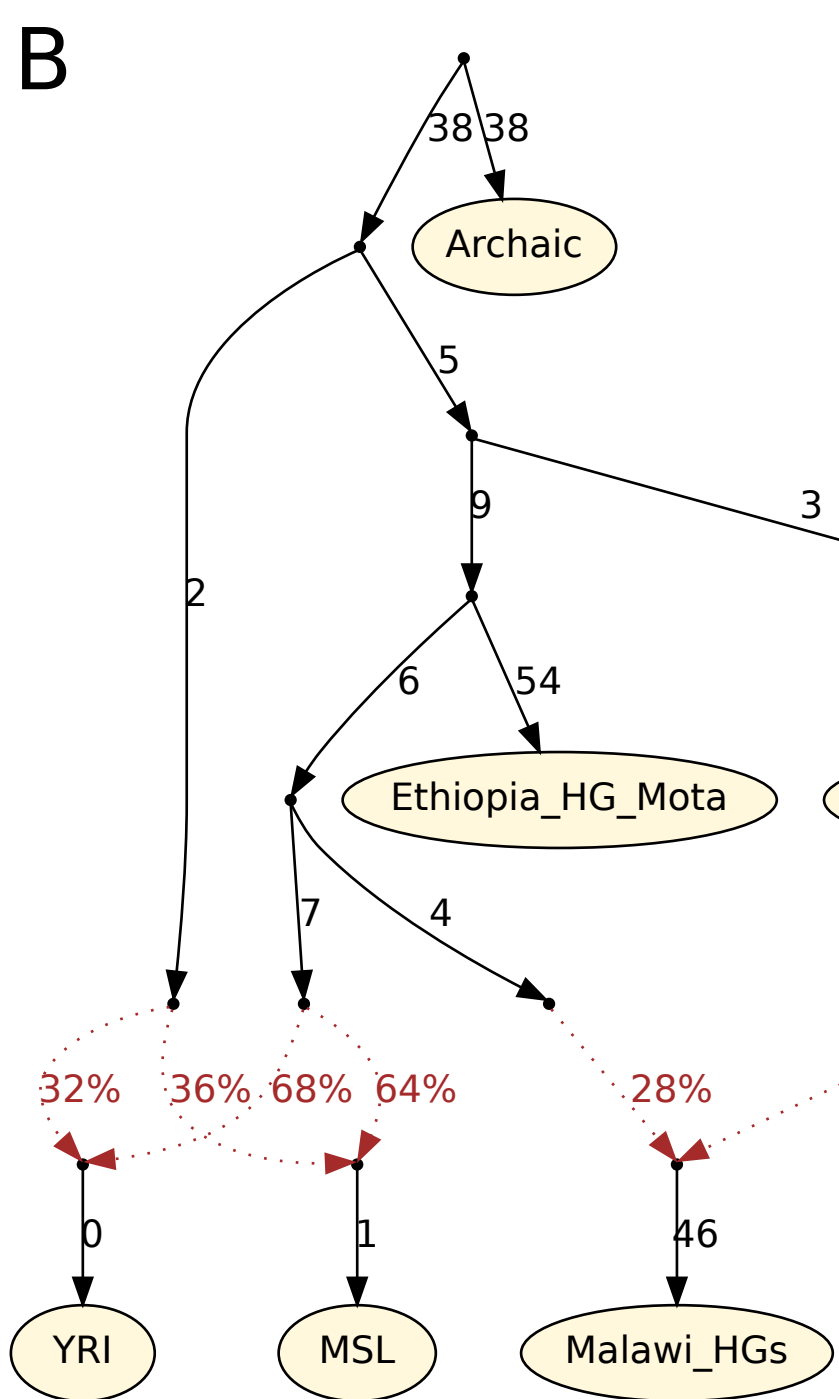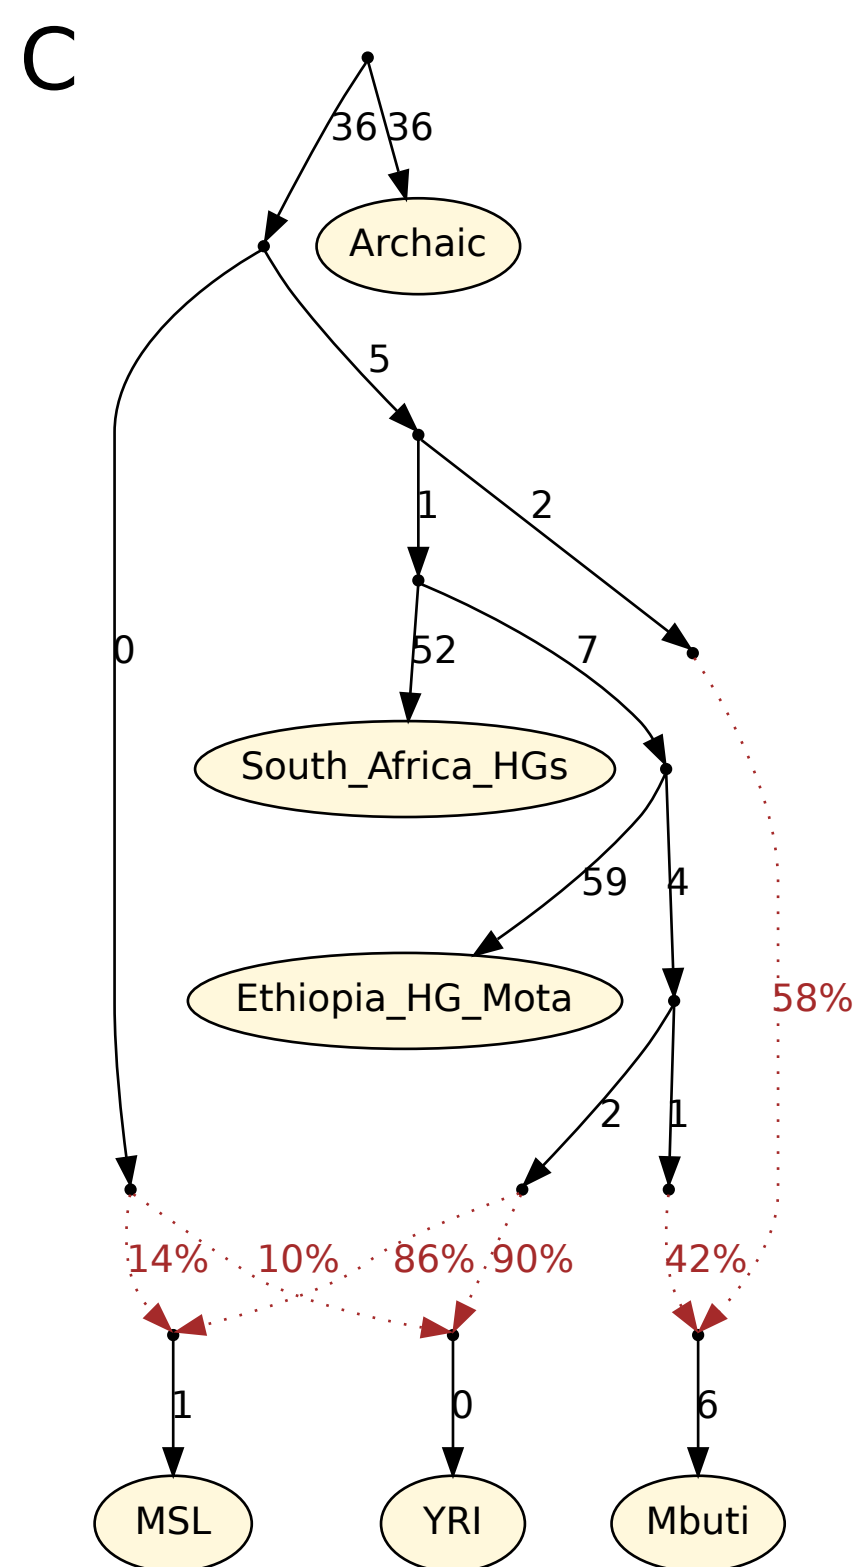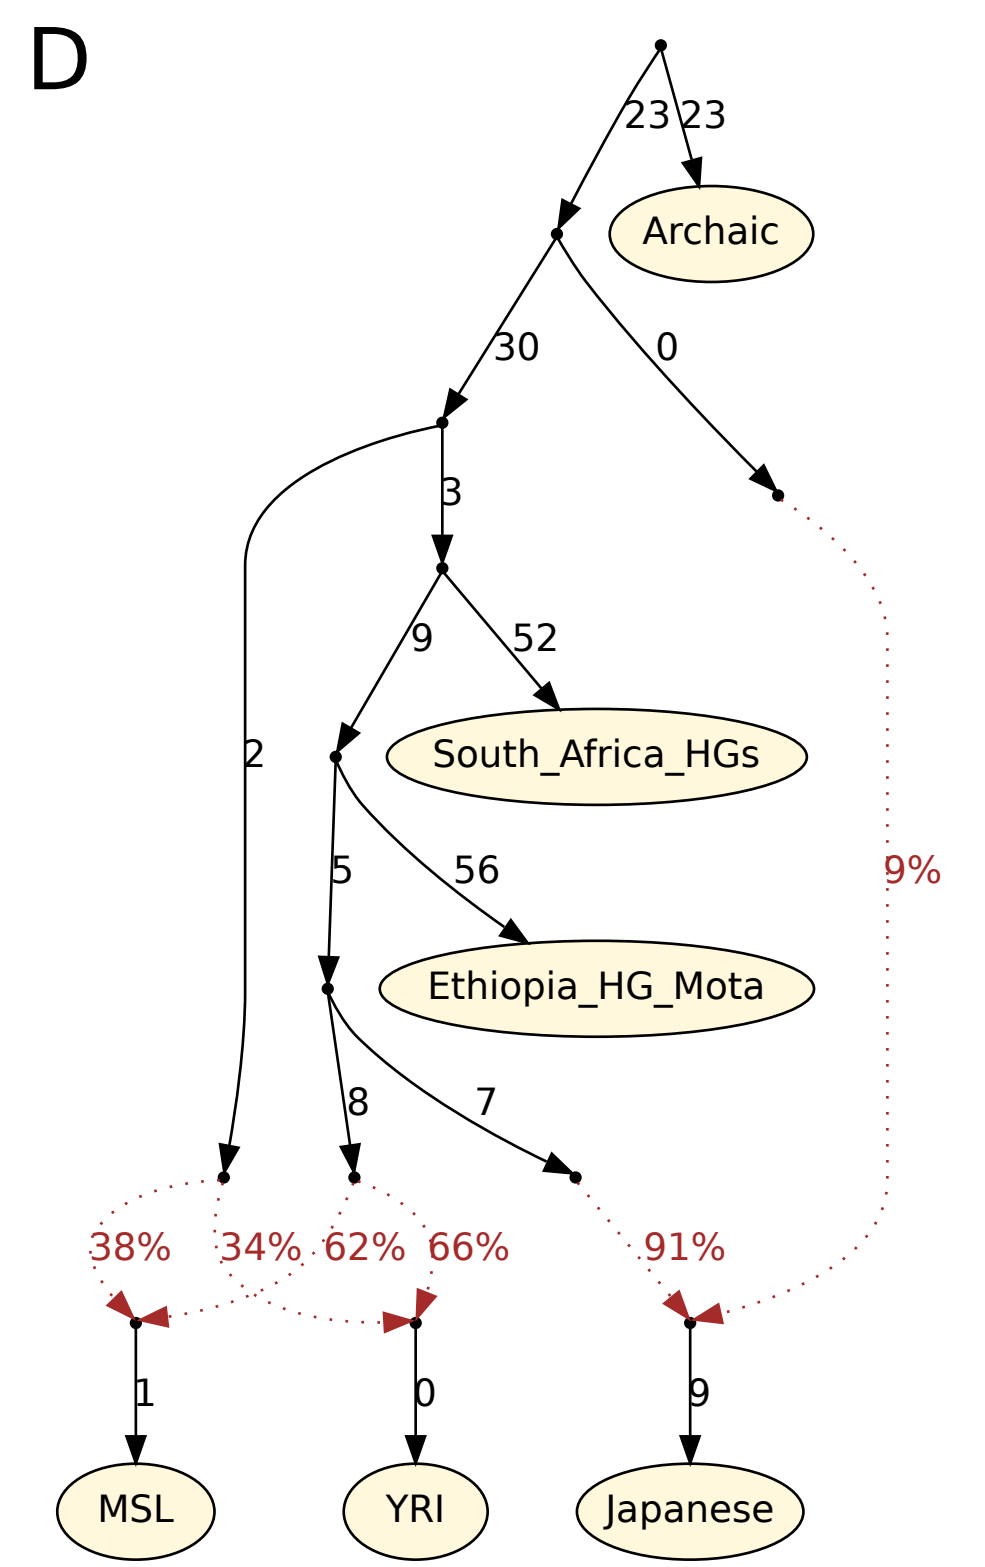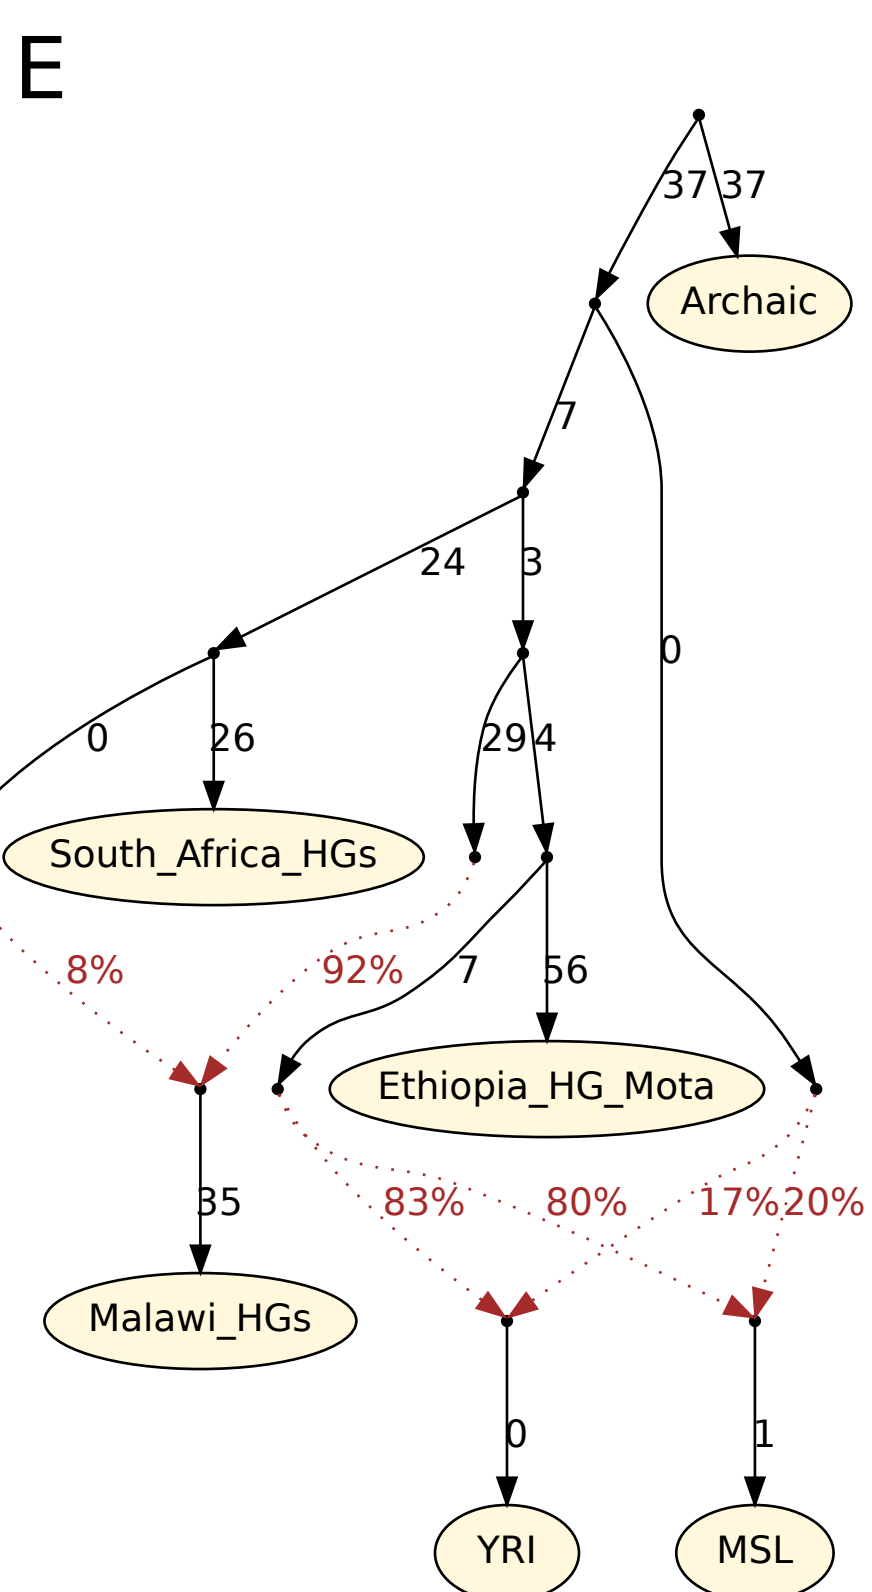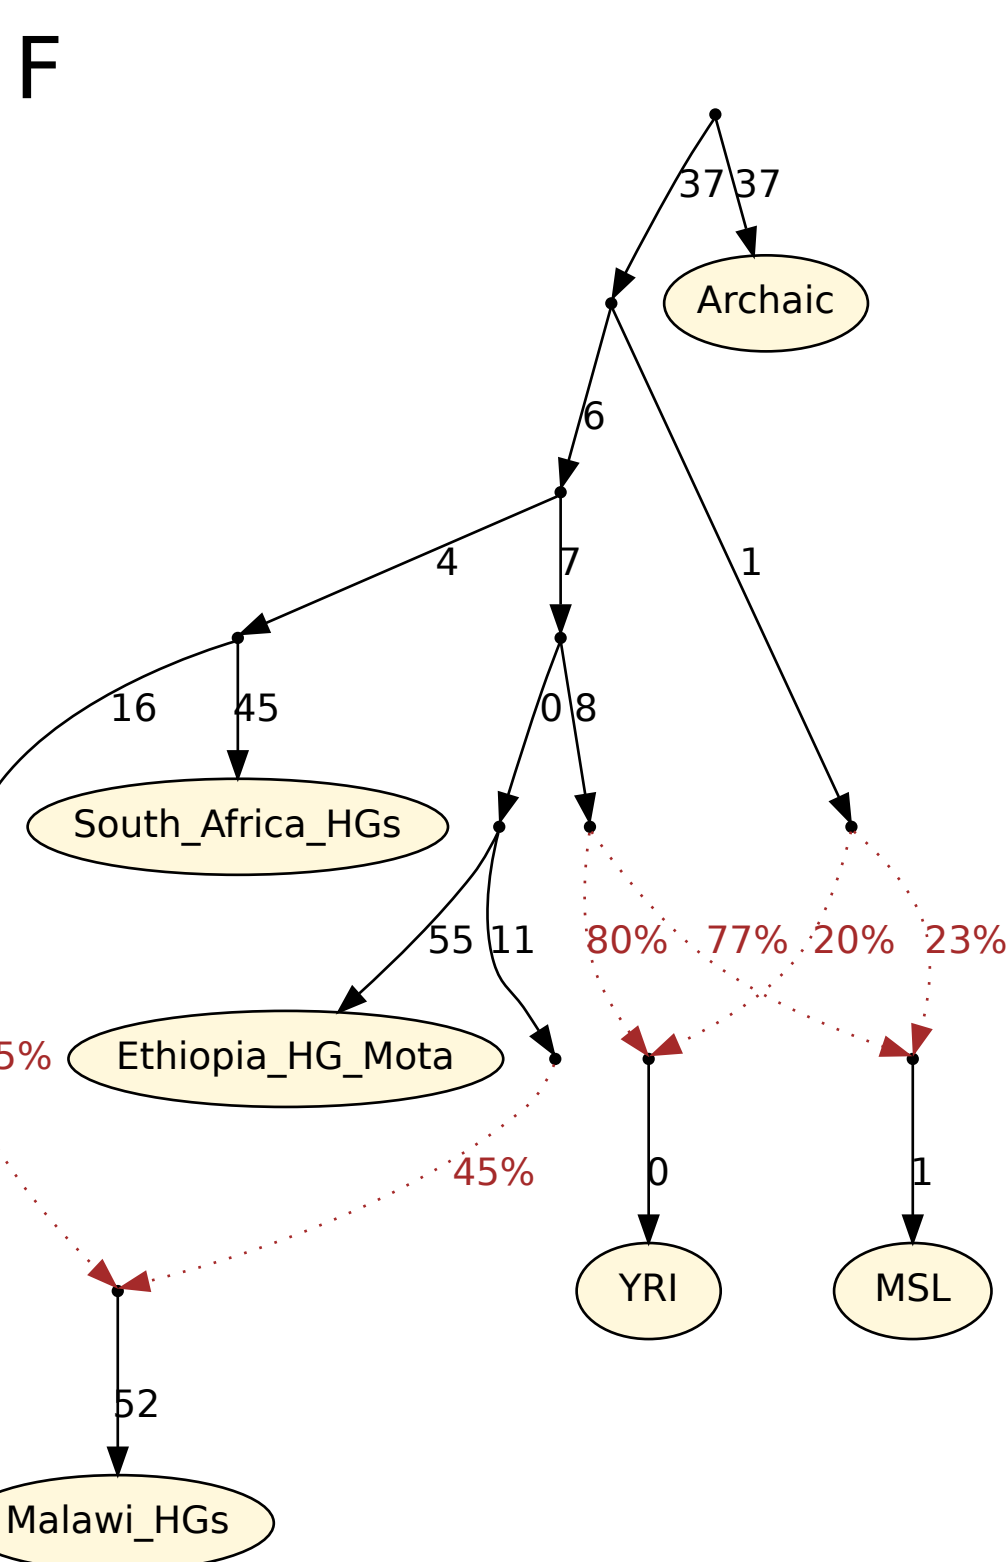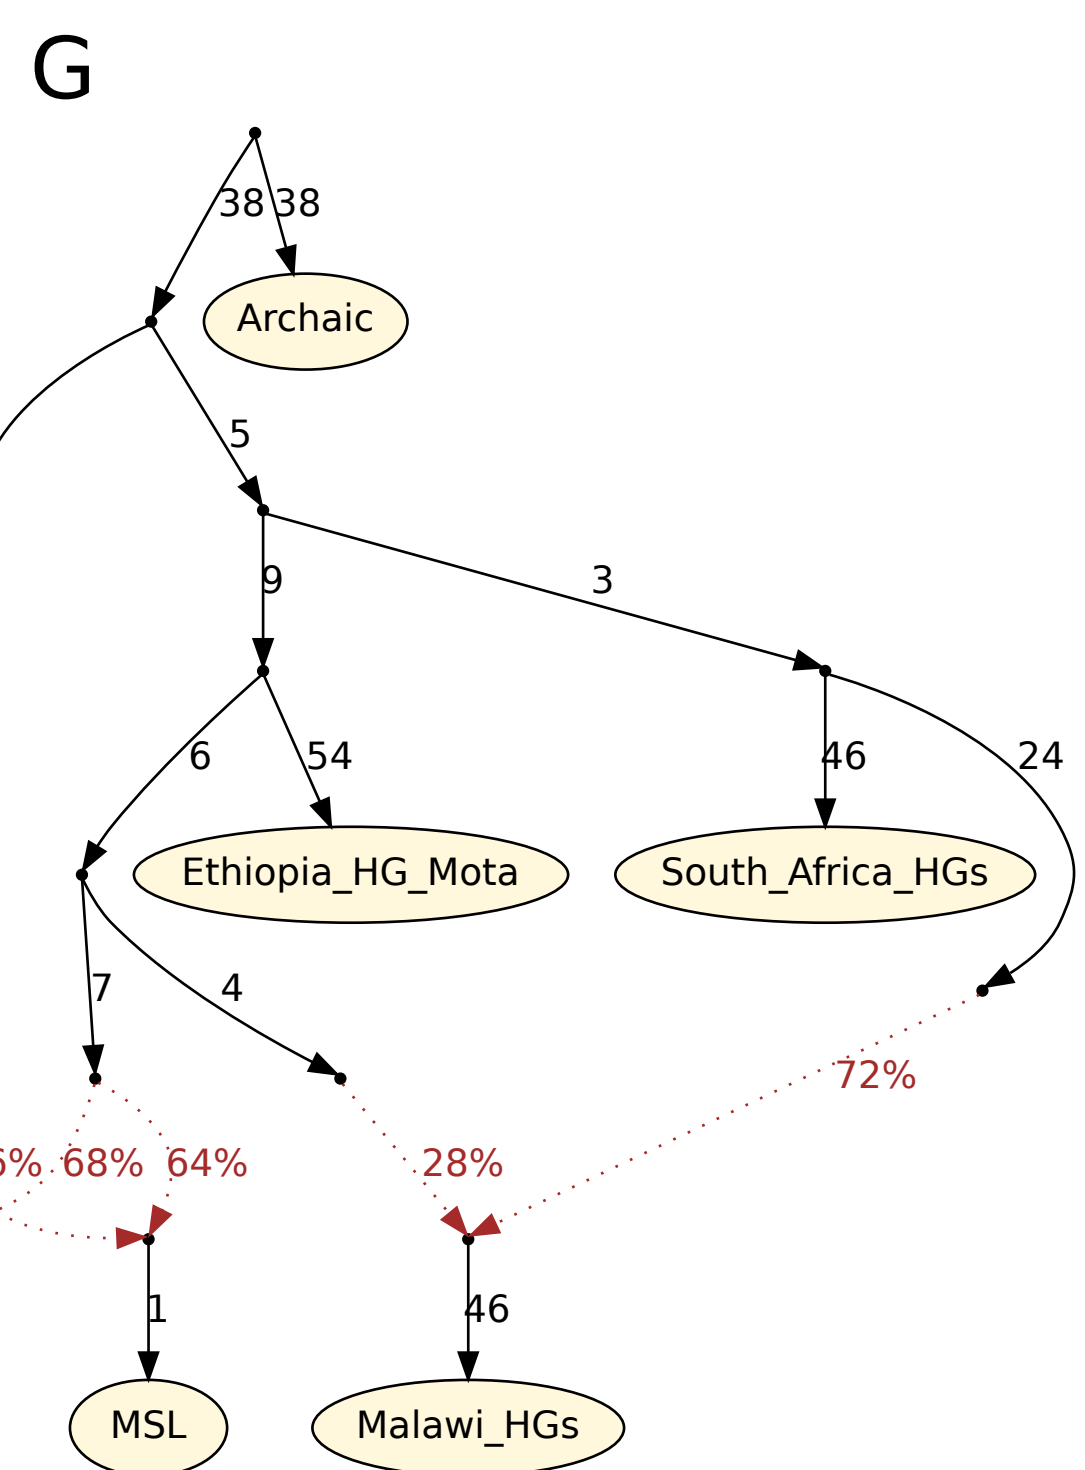

Supplement: NIHMS903612-supplement-12.pdf [file NIHMS903612-supplement-12.pdf]

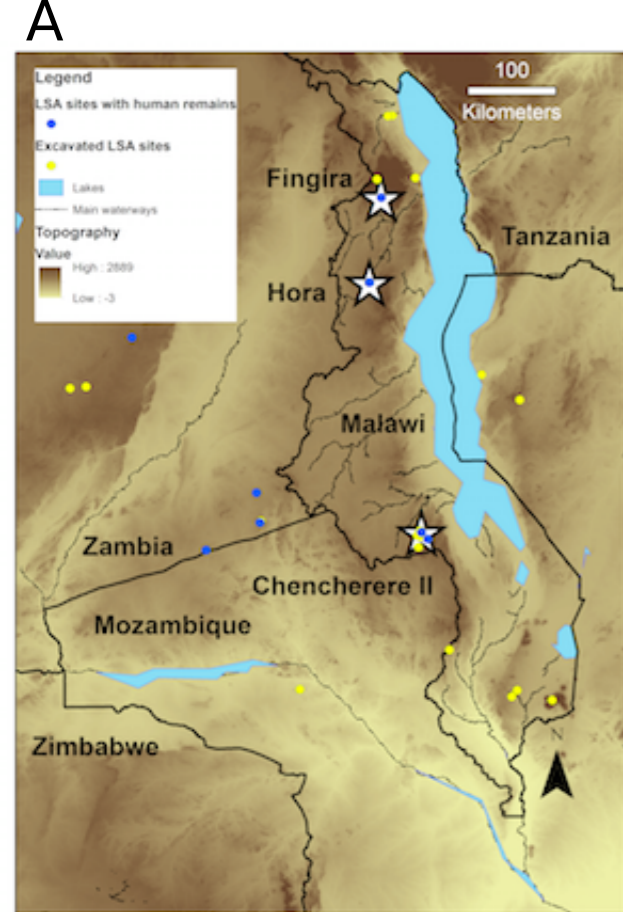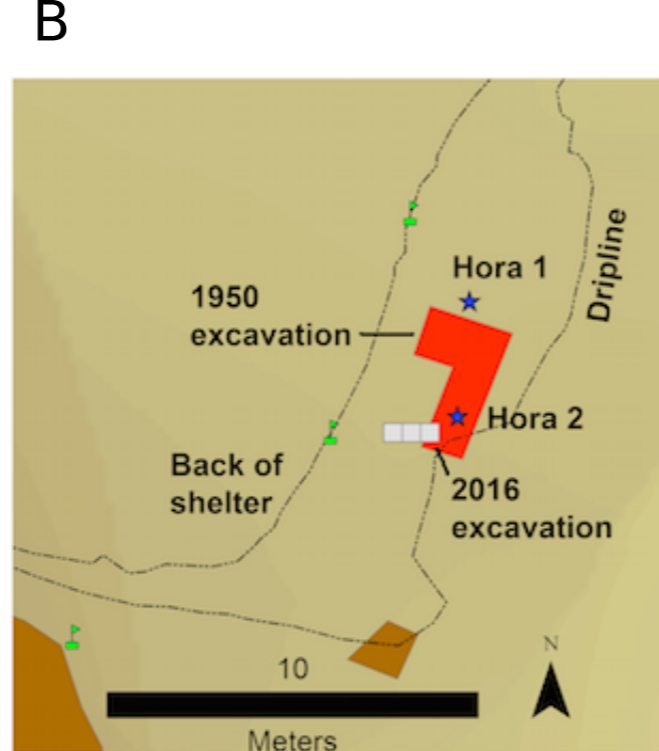

**Plan of Hora**

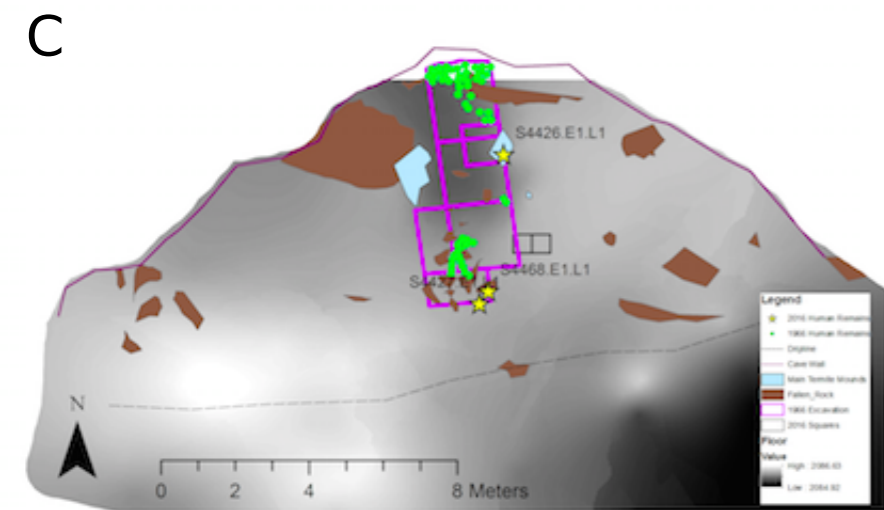

**Plan of Fingira**

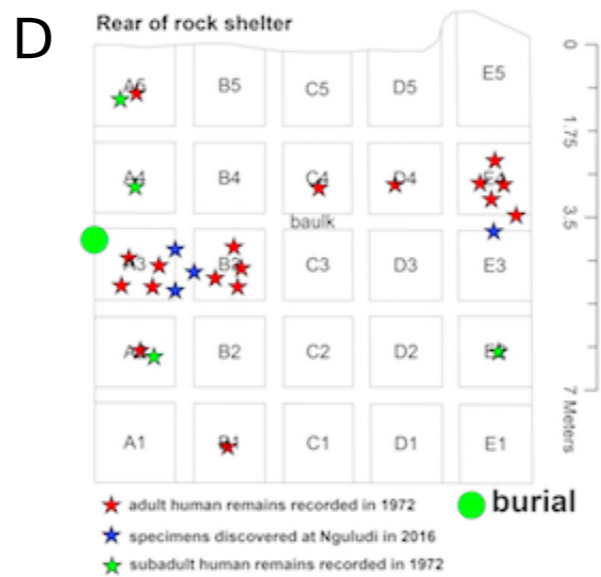

**Plan of Chencherere II  
 (redrawn from Crader [1984])**

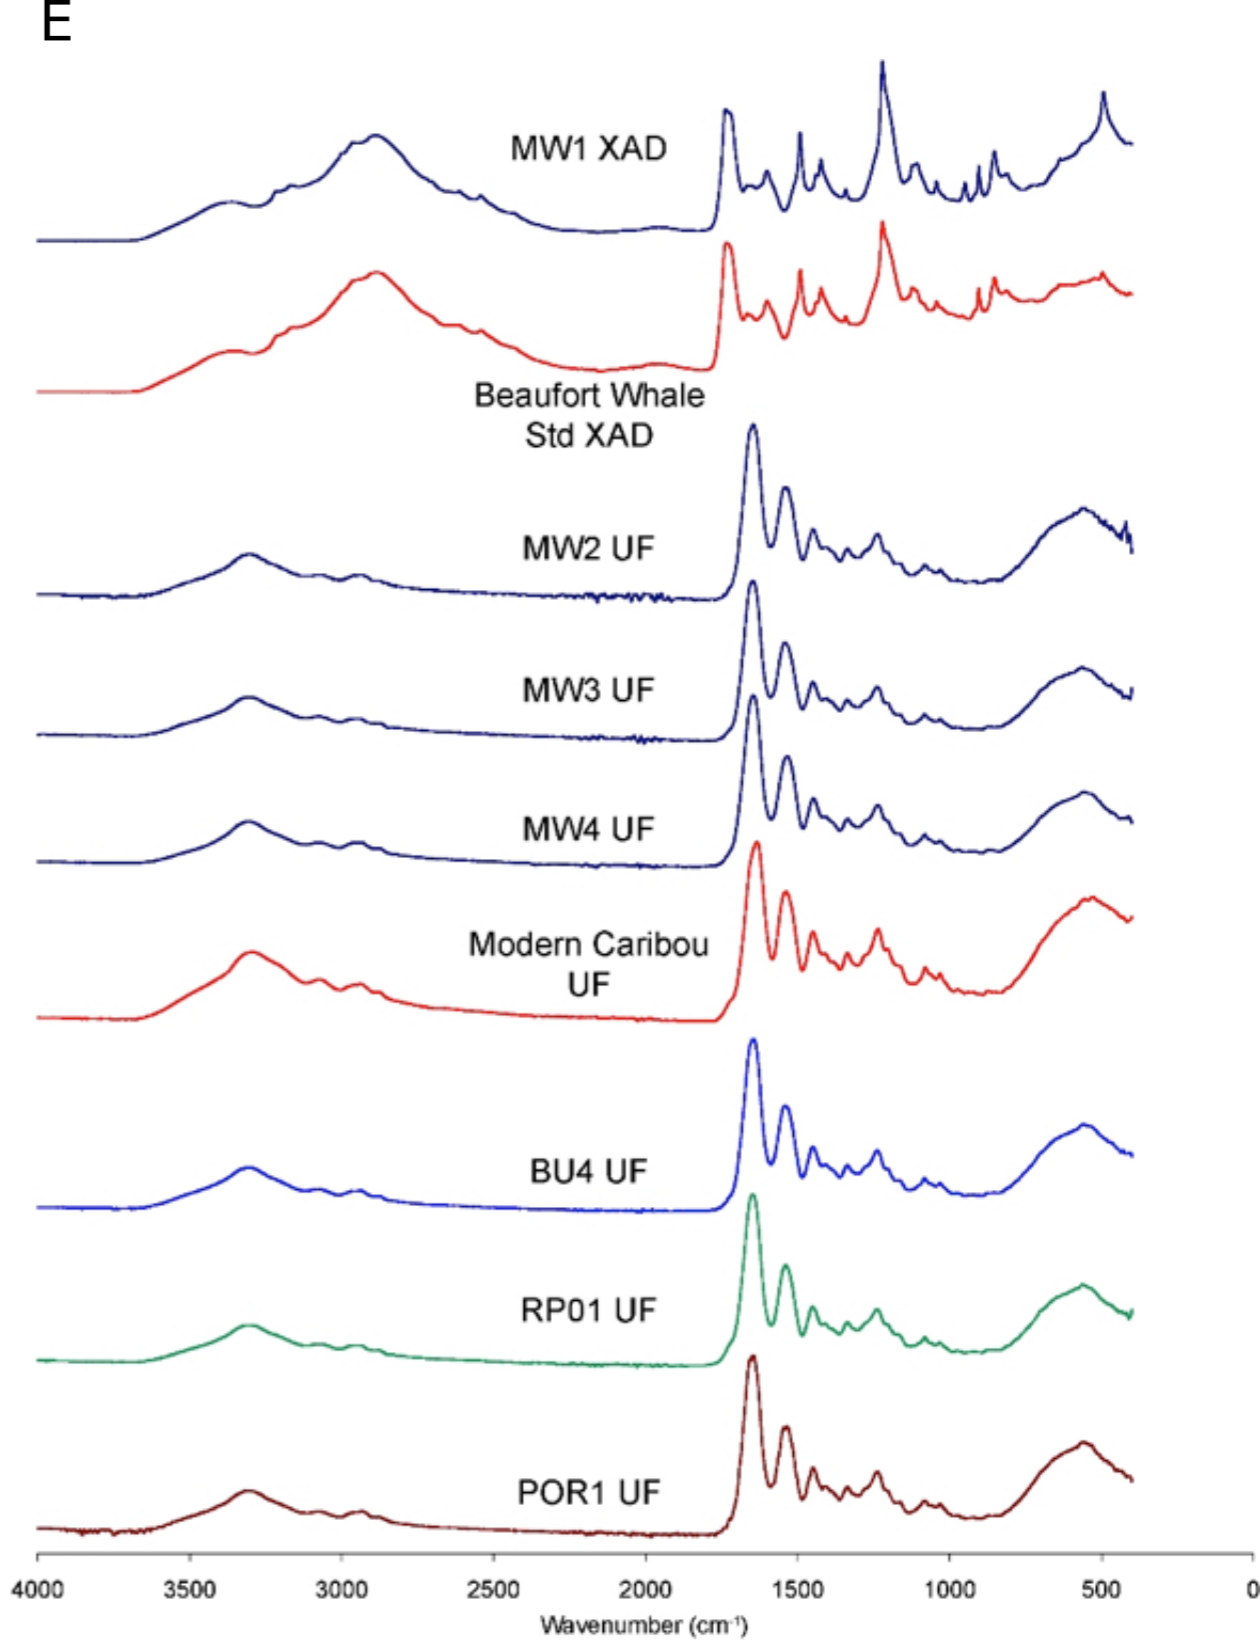

Supplement: NIHMS903612-supplement-8.pdf [file NIHMS903612-supplement-8.pdf]

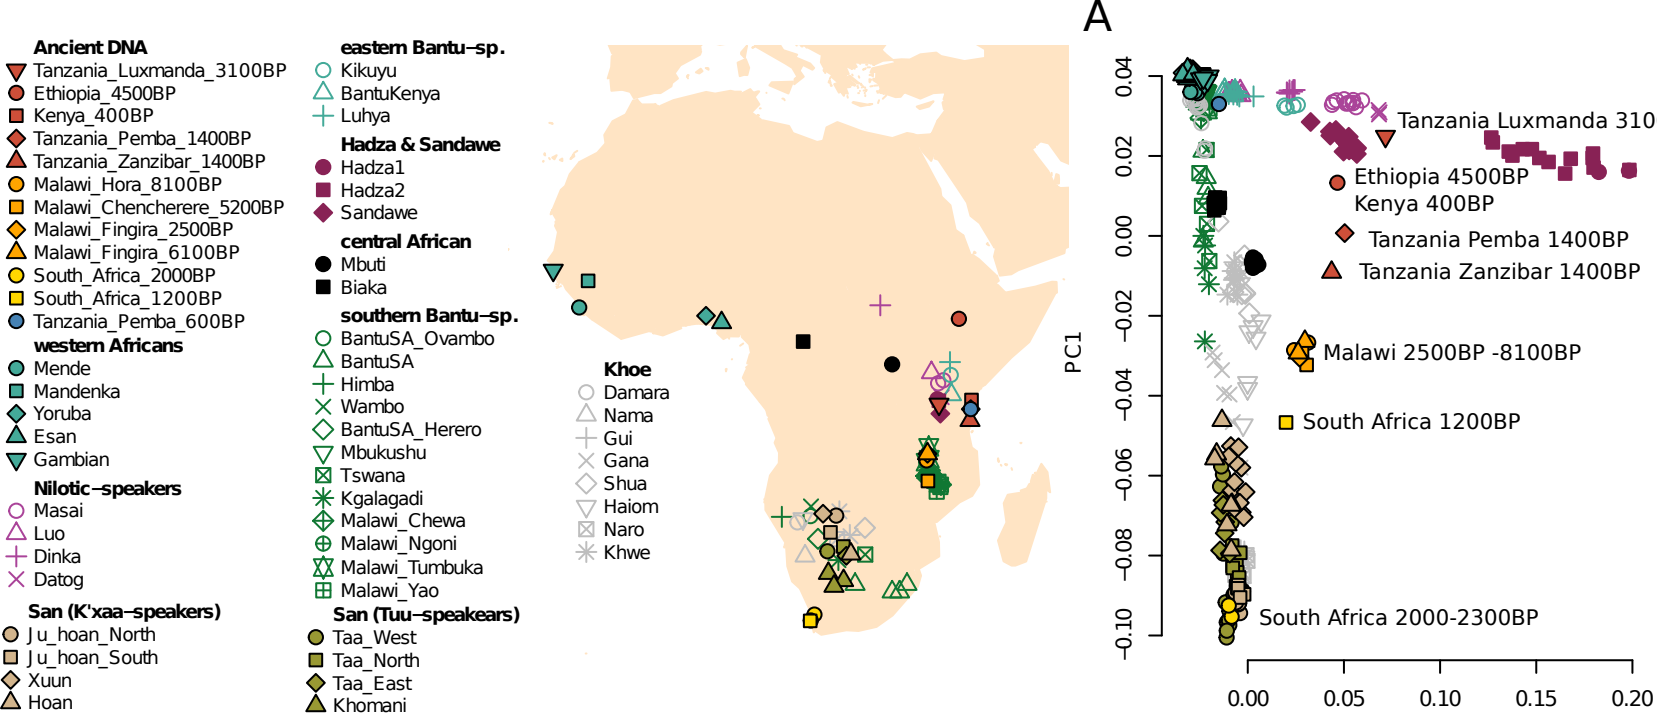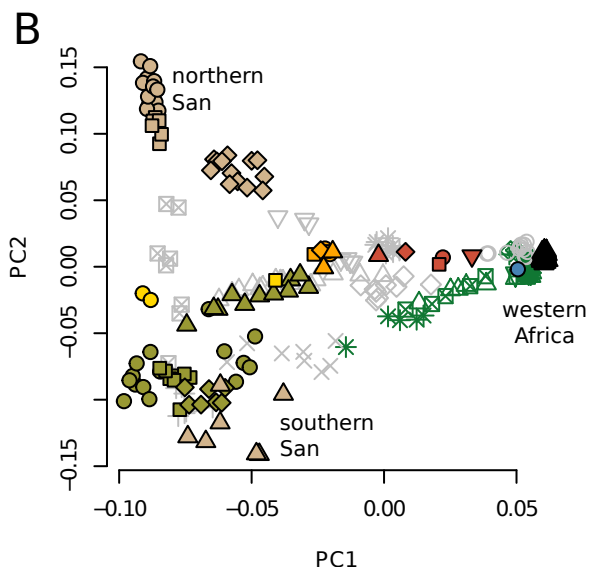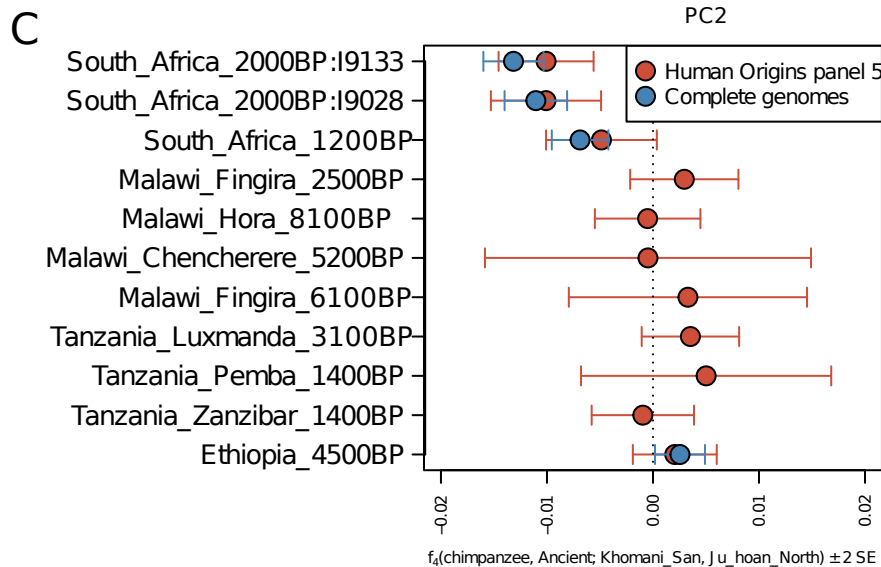

Supplement: NIHMS903612-supplement-9.pdf [file NIHMS903612-supplement-9.pdf]
